# Supplementary material for: Biogenic calcium carbonate as evidence for life
Source: Copernicus journal article supplement (doi:10.5194/egusphere-2022-1457), 2022-12-23
Supplement: Supplementary file 2 [file egusphere-2022-1457-supplement-version3.zip]

Archive with 2 entries (2 files):
- egusphere-2022-1457-supplement-version3.pdf
- Ronca et al. 2023 maggio suppl.xls
