# Supplementary material for: Biogenic calcium carbonate as evidence for life
Source: Copernicus journal article supplement (doi:10.5194/egusphere-2022-1457), 2022-12-23
Supplement: Supplementary file 2 [file egusphere-2022-1457-supplement-version3.zip › Ronca et al. 2023 maggio suppl.xls]

## Sheet: Phyla
Moonmilk Tomba Maggi				Moonmilk Tomba Scudi				sandstone				calcarenite
Proteobacteria	2485	0.65326		Proteobacteria	2507	0.635488		Proteobacteria	3660	0.763932		Proteobacteria	6029	0.65108
Actinobacteria	525	0.138013		Actinobacteria	480	0.121673		Firmicutes	387	0.0807765		Firmicutes	1090	0.117711
Firmicutes	347	0.0912198		Cyanobacteria	445	0.112801		Cyanobacteria	177	0.0369443		Actinobacteria	516	0.0557235
Bacteroidetes	243	0.0638801		Firmicutes	328	0.0831432		Actinobacteria	122	0.0254644		Planctomycetes	280	0.0302376
Planctomycetes	82	0.0215563		Nitrospirae	73	0.0185044		Acidobacteria	112	0.0233772		Nitrospirae	279	0.0301296
Acidobacteria	24	0.00630915		Acidobacteria	48	0.0121673		Verrucomicrobia	94	0.0196201		Gemmatimonadetes	209	0.0225702
Cyanobacteria	23	0.00604627		Planctomycetes	35	0.00887199		Bacteroidetes	79	0.0164893		Acidobacteria	203	0.0219222
Nitrospirae	17	0.00446898		Gemmatimonadetes	17	0.00430925		Nitrospirae	63	0.0131497		Verrucomicrobia	184	0.0198704
Chloroflexi	16	0.0042061		Bacteroidetes	12	0.00304183		Gemmatimonadetes	40	0.00834899		Bacteroidetes	120	0.012959
Candidatus Omnitrophica	14	0.00368034						Chloroflexi	21	0.00438322		Chloroflexi	92	0.00993521
Gemmatimonadetes	13	0.00341746						Planctomycetes	17	0.00354832		Cyanobacteria	86	0.00928726
Deinococcus-Thermus	8	0.00210305						Spirochaetes	10	0.00208725		Spirochaetes	31	0.00334773
Verrucomicrobia	7	0.00184017						Armatimonadetes	9	0.00187852		Deinococcus-Thermus	24	0.00259179
												Tenericutes	22	0.00237581
												Candidatus Omnitrophica	22	0.00237581
												Aquificae	16	0.00172786
												Armatimonadetes	12	0.0012959
												Fusobacteria	10	0.00107991
												Ignavibacteriae	10	0.00107991
												Synergistetes	10	0.00107991
												Thermotogae	8	0.000863931
												Chlamydiae	7	0.00075594

## Sheet: Class
Moonmilk Tomba Maggi				Moonmilk Tomba Scudi				sandstone				calcarenite
Alphaproteobacteria	1302	0.342541		Gammaproteobacteria	1335	0.384394		Gammaproteobacteria	2888	0.635004		Gammaproteobacteria	3995	0.437952
Gammaproteobacteria	935	0.245988		Alphaproteobacteria	873	0.251368		Alphaproteobacteria	357	0.078496		Betaproteobacteria	1014	0.11116
Actinomycetia	471	0.123915		Actinomycetia	478	0.137633		Bacilli	310	0.0681618		Bacilli	878	0.0962508
Bacilli	313	0.0823468		Bacilli	273	0.0786064		Betaproteobacteria	304	0.0668426		Alphaproteobacteria	713	0.0781627
Flavobacteriia	215	0.0565641		Betaproteobacteria	262	0.0754391		Actinomycetia	102	0.0224274		Actinomycetia	446	0.0488928
Betaproteobacteria	199	0.0523546		Nitrospira	73	0.0210193		Deltaproteobacteria	98	0.0215479		Nitrospira	279	0.0305854
Candidatus Babeliae	83	0.0218364		Clostridia	52	0.0149726		Opitutae	75	0.0164908		Deltaproteobacteria	220	0.0241175
Planctomycetia	64	0.0168377		Planctomycetia	35	0.0100777		Acidobacteriia	72	0.0158311		Gemmatimonadetes	209	0.0229116
Deltaproteobacteria	42	0.0110497		Deltaproteobacteria	29	0.00835013		Clostridia	66	0.0145119		Clostridia	181	0.0198421
Acidimicrobiia	38	0.00999737		Vicinamibacteria	28	0.00806219		Nitrospira	63	0.0138522		Phycisphaerae	177	0.0194036
Clostridia	31	0.00815575		Acidobacteriia	18	0.00518284		Chitinophagia	42	0.00923483		Opitutae	158	0.0173208
Vicinamibacteria	21	0.00552486		Gemmatimonadetes	17	0.0048949		Gemmatimonadetes	40	0.00879507		Acidobacteriia	104	0.011401
Bacteroidia	18	0.0047356						Vicinamibacteria	38	0.00835532		Planctomycetia	94	0.0103048
Nitrospira	17	0.00447251						Cytophagia	26	0.0057168		Vicinamibacteria	89	0.00975663
Gemmatimonadetes	13	0.00342015						Verrucomicrobiae	17	0.00373791		Flavobacteriia	53	0.00581013
Candidatus Brocadiae	11	0.00289398						Planctomycetia	14	0.00307828		Epsilonproteobacteria	47	0.00515238
Anaerolineae	9	0.0023678						Anaerolineae	10	0.00219877		Anaerolineae	34	0.00372725
Chitinophagia	8	0.00210471						Spirochaetia	10	0.00219877		Cytophagia	32	0.003508
Deinococci	8	0.00210471						Fimbriimonadia	9	0.00197889		Spirochaetia	31	0.00339838
Oligoflexia	3	0.000789266						Epsilonproteobacteria	7	0.00153914		Coriobacteriia	29	0.00317913
												Oligoflexia	29	0.00317913
												Deinococci	24	0.002631
												Caldilineae	23	0.00252138
												Mollicutes	22	0.00241175
												Verrucomicrobiae	20	0.0021925
												Acidimicrobiia	17	0.00186363
												Aquificae	16	0.001754
												Sphingobacteriia	16	0.001754
												Synergistia	15	0.00164438
												Tissierellia	15	0.00164438
												Bacteroidia	14	0.00153475
												Rubrobacteria	13	0.00142513
												Fimbriimonadia	11	0.00120588
												Fusobacteriia	10	0.00109625
												Ignavibacteria	10	0.00109625
												Tepidiformia	10	0.00109625
												Thermomicrobia	10	0.00109625
												Erysipelotrichia	9	0.000986626
												Holophagae	9	0.000986626
												Hydrogenophilalia	9	0.000986626
												Nitriliruptoria	8	0.000877001
												Thermotogae	8	0.000877001
												Candidatus Brocadiae	8	0.000877001
												Chlamydiia	7	0.000767376
												Negativicutes	6	0.00065775

## Sheet: Order
Moonmilk Tomba Maggi				Moonmilk Tomba Scudi				sandstone				calcarenite
Rhodobacterales	863	0.23081		Enterobacterales	681	0.178086		Enterobacterales	1733	0.37633		Enterobacterales	1713	0.189512
Enterobacterales	358	0.0957475		Hyphomicrobiales	556	0.145397		Thiotrichales	729	0.158306		Thiotrichales	1436	0.158867
Thiotrichales	252	0.0673977		Synechococcales	437	0.114278		Bacillales	278	0.0603692		Bacillales	768	0.0849652
Flavobacteriales	215	0.057502		Thiotrichales	364	0.0951883		Hyphomicrobiales	216	0.0469055		Burkholderiales	729	0.0806505
Hyphomicrobiales	205	0.0548275		Burkholderiales	252	0.0658996		Burkholderiales	209	0.0453855		Hyphomicrobiales	383	0.0423719
Bacillales	179	0.0478738		Rhodospirillales	225	0.0588389		Synechococcales	170	0.0369164		Nitrospirales	279	0.0308662
Burkholderiales	163	0.0435945		Propionibacteriales	214	0.0559623		Acidiferrobacterales	135	0.029316		Pseudomonadales	256	0.0283217
Caulobacterales	160	0.0427922		Bacillales	165	0.0431485		Rhodospirillales	89	0.0193268		Gemmatimonadales	209	0.023122
Lactobacillales	133	0.035571		Pseudonocardiales	109	0.0285042		Pseudomonadales	87	0.0188925		Nitrosomonadales	156	0.0172585
Propionibacteriales	130	0.0347687		Lactobacillales	108	0.0282427		Opitutales	73	0.0158523		Opitutales	154	0.0170373
Pseudomonadales	119	0.0318267		Corynebacteriales	84	0.0219665		Nitrospirales	63	0.0136808		Sphingomonadales	153	0.0169267
Candidatus Babeliales	104	0.0278149		Nitrospirales	73	0.01909		Bryobacterales	58	0.012595		Corynebacteriales	144	0.015931
Micrococcales	101	0.0270126		Nevskiales	68	0.0177824		Eubacteriales	54	0.0117264		Eubacteriales	135	0.0149353
Xanthomonadales	92	0.0246055		Vibrionales	55	0.0143828		Acidobacteriales	52	0.0112921		Phycisphaerales	135	0.0149353
Corynebacteriales	55	0.0147098		Xanthomonadales	53	0.0138598		Myxococcales	48	0.0104235		Bryobacterales	126	0.0139396
Sphingomonadales	51	0.01364		Pseudomonadales	51	0.0133368		Legionellales	47	0.0102063		Lactobacillales	110	0.0121695
Streptomycetales	44	0.0117679		Sphingomonadales	47	0.0122908		Chitinophagales	42	0.00912052		Chromatiales	104	0.0115057
Streptosporangiales	44	0.0117679		Eubacteriales	46	0.0120293		Gemmatimonadales	40	0.00868621		Xanthomonadales	103	0.0113951
Acidimicrobiales	38	0.0101631		Chromatiales	28	0.00732218		Nitrosomonadales	38	0.0082519		Rhodospirillales	102	0.0112844
Vibrionales	35	0.00936079		Streptomycetales	28	0.00732218		Streptomycetales	36	0.00781759		Vibrionales	79	0.0087399
Bifidobacteriales	26	0.00695373		Myxococcales	23	0.00601464		Rhodocyclales	34	0.00738328		Streptomycetales	75	0.00829738
Gemmatales	26	0.00695373		Bryobacterales	20	0.00523013		Lactobacillales	32	0.00694897		Neisseriales	72	0.00796548
Geodermatophilales	24	0.00641883		Rhodobacterales	20	0.00523013		Nevskiales	28	0.00608035		Acidobacteriales	67	0.00741232
Nitrosomonadales	22	0.00588393		Pirellulales	18	0.00470711		Alteromonadales	27	0.00586319		Myxococcales	64	0.00708043
Pirellulales	22	0.00588393		Gemmatimonadales	17	0.00444561		Cytophagales	26	0.00564604		Rhodocyclales	56	0.00619538
Acidiferrobacterales	21	0.00561647		Planctomycetales	16	0.0041841		Neisseriales	22	0.00477742		Nevskiales	55	0.00608474
Synechococcales	21	0.00561647		Rickettsiales	16	0.0041841		Corynebacteriales	20	0.00434311		Flavobacteriales	53	0.00586348
Eubacteriales	20	0.00534902		Actinomycetales	15	0.00392259		Verrucomicrobiales	20	0.00434311		Alteromonadales	50	0.00553159
Nevskiales	20	0.00534902		Legionellales	15	0.00392259		Xanthomonadales	20	0.00434311		Desulfuromonadales	48	0.00531032
Pseudonocardiales	20	0.00534902		Micrococcales	12	0.00313808		Chromatiales	19	0.00412595		Desulfovibrionales	46	0.00508906
Rhodospirillales	19	0.00508157		Nitrosomonadales	8	0.00209205		Propionibacteriales	17	0.00369164		Bifidobacteriales	44	0.0048678
Bacteroidales	17	0.00454667						Desulfovibrionales	16	0.00347448		Streptosporangiales	42	0.00464653
Myxococcales	17	0.00454667						Sphingomonadales	14	0.00304017		Acidiferrobacterales	40	0.00442527
Nitrospirales	17	0.00454667						Desulfuromonadales	13	0.00282302		Legionellales	39	0.00431464
Planctomycetales	14	0.00374432						Vibrionales	13	0.00282302		Planctomycetales	38	0.004204
Desulfovibrionales	13	0.00347687						Desulfobacterales	12	0.00260586		Synechococcales	38	0.004204
Gemmatimonadales	13	0.00347687						Cellvibrionales	11	0.00238871		Rhodobacterales	37	0.00409337
Rhodocyclales	11	0.00294196						Anaerolineales	10	0.00217155		Propionibacteriales	36	0.00398274
Candidatus Brocadiales	11	0.00294196						Rhodobacterales	10	0.00217155		Micrococcales	35	0.00387211
Alteromonadales	10	0.00267451						Aeromonadales	9	0.0019544		Syntrophobacterales	35	0.00387211
Actinomycetales	9	0.00240706						Fimbriimonadales	9	0.0019544		Anaerolineales	34	0.00376148
Anaerolineales	9	0.00240706						Oceanospirillales	9	0.0019544		Gemmatales	34	0.00376148
Chitinophagales	8	0.00213961						Rickettsiales	9	0.0019544		Cytophagales	32	0.00354021
Oceanospirillales	8	0.00213961						Methylococcales	8	0.00173724		Oscillatoriales	32	0.00354021
												Nautiliales	31	0.00342958
												Cardiobacteriales	29	0.00320832
												Thermoanaerobacterales	27	0.00298706
												Oceanospirillales	26	0.00287642
												Caldilineales	23	0.00254453
												Pasteurellales	23	0.00254453
												Sedimentisphaerales	21	0.00232327
												Tepidisphaerales	21	0.00232327
												Verrucomicrobiales	21	0.00232327
												Aeromonadales	20	0.00221263
												Actinomycetales	19	0.002102
												Eggerthellales	19	0.002102
												Bdellovibrionales	18	0.00199137
												Acidimicrobiales	17	0.00188074
												Aquificales	16	0.00177011
												Mycoplasmatales	16	0.00177011
												Campylobacterales	15	0.00165948
												Synergistales	15	0.00165948
												Tissierellales	15	0.00165948
												Bacteroidales	14	0.00154884
												Pirellulales	14	0.00154884
												Pseudonocardiales	14	0.00154884
												Brachyspirales	13	0.00143821
												Desulfobacterales	13	0.00143821
												Rubrobacterales	13	0.00143821
												Spirochaetales	13	0.00143821
												Cellvibrionales	12	0.00132758
												Deinococcales	12	0.00132758
												Rickettsiales	12	0.00132758
												Bacteriovoracales	11	0.00121695
												Fimbriimonadales	11	0.00121695
												Sphingobacteriales	11	0.00121695
												Coriobacteriales	10	0.00110632
												Fusobacteriales	10	0.00110632
												Ignavibacteriales	10	0.00110632
												Tepidiformales	10	0.00110632
												Thermales	10	0.00110632
												Erysipelotrichales	9	0.000995685
												Hydrogenophilales	9	0.000995685
												Thermotomaculales	9	0.000995685
												Halanaerobiales	8	0.000885054
												Candidatus Brocadiales	8	0.000885054
												Candidatus Nanopelagicales	8	0.000885054
												Thermotogales	7	0.000774422

## Sheet: Family
Moonmilk Tomba Maggi				Moonmilk Tomba Scudi				sandstone				calcarenite
Rhodobacteraceae	866	0.246935		Enterobacteriaceae	662	0.178053		Enterobacteriaceae	1698	0.390974		Enterobacteriaceae	1621	0.186087
Enterobacteriaceae	347	0.098945		Leptolyngbyaceae	434	0.116729		Francisellaceae	725	0.166935		Francisellaceae	1425	0.163586
Francisellaceae	250	0.071286		Francisellaceae	363	0.0976331		Bacillaceae	232	0.0534193		Bacillaceae	598	0.0686488
Weeksellaceae	205	0.0584545		Hyphomicrobiaceae	229	0.0615923		Leptolyngbyaceae	166	0.0382224		Burkholderiaceae	380	0.043623
Caulobacteraceae	160	0.045623		Propionibacteriaceae	201	0.0540613		Acidiferrobacteraceae	135	0.0310845		Nitrospiraceae	279	0.0320285
Hyphomicrobiaceae	126	0.0359281		Comamonadaceae	179	0.0481442		Burkholderiaceae	117	0.0269399		Gemmatimonadaceae	209	0.0239927
Propionibacteriaceae	126	0.0359281		Bradyrhizobiaceae	121	0.0325444		Opitutaceae	73	0.0168087		Comamonadaceae	178	0.0204339
Moraxellaceae	108	0.0307956		Rhodospirillaceae	114	0.0306616		Nitrospiraceae	63	0.0145061		Opitutaceae	154	0.0176788
Xanthomonadaceae	89	0.0253778		Pseudonocardiaceae	109	0.0293168		Moraxellaceae	52	0.0119733		Sphingomonadaceae	146	0.0167604
Bacillaceae	86	0.0245224		Staphylococcaceae	83	0.0223238		Acetobacteraceae	45	0.0103615		Hyphomicrobiaceae	142	0.0163012
Candidatus Babeliaceae	83	0.023667		Streptococcaceae	83	0.0223238		Rhizobiaceae	44	0.0101312		Phycisphaeraceae	135	0.0154976
Staphylococcaceae	81	0.0230967		Azospirillaceae	80	0.0215169		Chitinophagaceae	43	0.00990099		Pseudomonadaceae	130	0.0149237
Micrococcaceae	78	0.0222412		Methylobacteriaceae	78	0.020979		Comamonadaceae	43	0.00990099		Moraxellaceae	125	0.0143497
Oxalobacteraceae	68	0.0193898		Bacillaceae	73	0.0196342		Coxiellaceae	43	0.00990099		Oxalobacteraceae	117	0.0134313
Streptomycetaceae	63	0.0179641		Nitrospiraceae	73	0.0196342		Streptomycetaceae	42	0.00967073		Xanthomonadaceae	91	0.0104466
Aerococcaceae	62	0.0176789		Steroidobacteraceae	68	0.0182894		Gemmatimonadaceae	40	0.00921022		Vicinamibacteraceae	89	0.010217
Burkholderiaceae	50	0.0142572		Burkholderiaceae	67	0.0180204		Rhodospirillaceae	40	0.00921022		Vibrionaceae	79	0.00906899
Sphingomonadaceae	50	0.0142572		Sphingomonadaceae	56	0.0150619		Pseudomonadaceae	38	0.00874971		Paenibacillaceae	78	0.0089542
Streptococcaceae	49	0.0139721		Vibrionaceae	55	0.0147929		Vicinamibacteraceae	38	0.00874971		Streptomycetaceae	76	0.0087246
Rhizobiaceae	41	0.0116909		Acetobacteraceae	53	0.014255		Solibacteraceae	34	0.00782869		Corynebacteriaceae	71	0.00815061
Vibrionaceae	35	0.00998004		Beijerinckiaceae	51	0.0137171		Paenibacillaceae	29	0.00667741		Neisseriaceae	70	0.00803582
Mycobacteriaceae	34	0.0096949		Xanthomonadaceae	49	0.0131791		Alcaligenaceae	28	0.00644716		Acidobacteriaceae	67	0.00769142
Comamonadaceae	32	0.00912461		Corynebacteriaceae	31	0.00833782		Clostridiaceae	25	0.00575639		Desulfovibrionaceae	67	0.00769142
Bifidobacteriaceae	31	0.00883946		Pseudomonadaceae	30	0.00806885		Bryobacteraceae	23	0.00529588		Brucellaceae	64	0.00734703
Iamiaceae	29	0.00826918		Vicinamibacteraceae	29	0.00779989		Fulvivirgaceae	20	0.00460511		Rhizobiaceae	62	0.00711744
Gemmataceae	26	0.00741374		Streptomycetaceae	28	0.00753093		Hyphomicrobiaceae	20	0.00460511		Rhodospirillaceae	62	0.00711744
Geodermatophilaceae	25	0.0071286		Mycobacteriaceae	27	0.00726197		Neisseriaceae	20	0.00460511		Ectothiorhodospiraceae	61	0.00700264
Pirellulaceae	22	0.00627317		Peptostreptococcaceae	27	0.00726197		Steroidobacteraceae	20	0.00460511		Mycobacteriaceae	59	0.00677305
Acidiferrobacteraceae	21	0.00598802		Ectothiorhodospiraceae	23	0.00618612		Verrucomicrobiaceae	20	0.00460511		Sinobacteraceae	51	0.00585467
Vicinamibacteraceae	21	0.00598802		Lactobacillaceae	22	0.00591716		Xanthomonadaceae	20	0.00460511		Staphylococcaceae	50	0.00573987
Microbacteriaceae	20	0.00570288		Rhizobiaceae	21	0.0056482		Yersiniaceae	19	0.00437486		Yersiniaceae	49	0.00562507
Pseudonocardiaceae	20	0.00570288		Rhodobacteraceae	21	0.0056482		Lactobacillaceae	18	0.0041446		Lactobacillaceae	47	0.00539548
Lactobacillaceae	19	0.00541774		Moraxellaceae	20	0.00537924		Sterolibacteriaceae	18	0.0041446		Streptococcaceae	46	0.00528068
Nitrospiraceae	17	0.00484745		Gemmatimonadaceae	17	0.00457235		Polyangiaceae	17	0.00391434		Bifidobacteriaceae	44	0.00505108
Acetobacteraceae	16	0.0045623		Pirellulaceae	17	0.00457235		Rhodocyclaceae	16	0.00368409		Methylophilaceae	43	0.00493629
Planctomycetaceae	14	0.00399202		Nocardiaceae	16	0.00430339		Azospirillaceae	15	0.00345383		Clostridiaceae	41	0.00470669
Prevotellaceae	14	0.00399202		Planctomycetaceae	16	0.00430339		Desulfovibrionaceae	15	0.00345383		Acidiferrobacteraceae	40	0.0045919
Gemmatimonadaceae	13	0.00370687		Actinomycetaceae	15	0.00403443		Oxalobacteraceae	15	0.00345383		Alcaligenaceae	39	0.0044771
Nocardiaceae	11	0.00313658		Bryobacteraceae	15	0.00403443		Acidobacteriaceae	14	0.00322358		Planctomycetaceae	39	0.0044771
Steroidobacteraceae	11	0.00313658		Rickettsiaceae	14	0.00376547		Desulfobacteraceae	14	0.00322358		Microcoleaceae	37	0.0042475
Candidatus Brocadiaceae	11	0.00313658		Clostridiaceae	13	0.0034965		Sphingomonadaceae	14	0.00322358		Rhodobacteraceae	37	0.0042475
Corynebacteriaceae	10	0.00285144		Coxiellaceae	13	0.0034965		Morganellaceae	13	0.00299332		Zoogloeaceae	36	0.00413271
Pseudomonadaceae	10	0.00285144		Nocardioidaceae	12	0.00322754		Vibrionaceae	13	0.00299332		Chromatiaceae	35	0.00401791
Actinomycetaceae	9	0.0025663		Gordoniaceae	10	0.00268962		Nitrosomonadaceae	11	0.00253281		Gemmataceae	35	0.00401791
Anaerolineaceae	9	0.0025663						Nocardioidaceae	11	0.00253281		Anaerolineaceae	34	0.00390311
Methylocystaceae	9	0.0025663						Phyllobacteriaceae	11	0.00253281		Usitatibacteraceae	34	0.00390311
Morganellaceae	9	0.0025663						Rhodobacteraceae	11	0.00253281		Weeksellaceae	34	0.00390311
Sinobacteraceae	9	0.0025663						Sandaracinaceae	11	0.00253281		Nocardiopsaceae	33	0.00378831
Chitinophagaceae	8	0.00228115						Anaerolineaceae	10	0.00230256		Peptococcaceae	33	0.00378831
Nocardioidaceae	4	0.00114058						Shewanellaceae	10	0.00230256		Nitrosomonadaceae	32	0.00367352
								Aeromonadaceae	9	0.0020723		Nautiliaceae	30	0.00344392
								Alteromonadaceae	9	0.0020723		Cardiobacteriaceae	29	0.00332912
								Anaeromyxobacteraceae	9	0.0020723		Syntrophotaleaceae	29	0.00332912
								Beijerinckiaceae	9	0.0020723		Shewanellaceae	28	0.00321433
								Bradyrhizobiaceae	9	0.0020723		Gallionellaceae	26	0.00298473
								Chromatiaceae	9	0.0020723		Acetobacteraceae	25	0.00286993
								Fimbriimonadaceae	9	0.0020723		Polyangiaceae	25	0.00286993
								Fluviibacteraceae	9	0.0020723		Coxiellaceae	24	0.00275514
								Planococcaceae	9	0.0020723		Fulvivirgaceae	24	0.00275514
								Spongiibacteraceae	9	0.0020723		Leptolyngbyaceae	24	0.00275514
								Streptococcaceae	9	0.0020723		Morganellaceae	24	0.00275514
								Methylococcaceae	8	0.00184204		Caldilineaceae	23	0.00264034
								Rickettsiaceae	8	0.00184204		Pasteurellaceae	23	0.00264034
								Sinobacteraceae	8	0.00184204		Solibacteraceae	23	0.00264034
								Zoogloeaceae	8	0.00184204		Parvibaculaceae	22	0.00252554
												Nocardioidaceae	21	0.00241075
												Tepidisphaeraceae	21	0.00241075
												Methylobacteriaceae	20	0.00229595
												Microbacteriaceae	20	0.00229595
												Oscillospiraceae	20	0.00229595
												Sandaracinaceae	20	0.00229595
												Syntrophaceae	20	0.00229595
												Actinomycetaceae	19	0.00218115
												Eggerthellaceae	19	0.00218115
												Aeromonadaceae	18	0.00206635
												Bdellovibrionaceae	18	0.00206635
												Rhodocyclaceae	18	0.00206635
												Sutterellaceae	18	0.00206635
												Beijerinckiaceae	17	0.00195156
												Sterolibacteriaceae	17	0.00195156
												Verrucomicrobiaceae	17	0.00195156
												Aquificaceae	16	0.00183676
												Enterococcaceae	16	0.00183676
												Mycoplasmataceae	16	0.00183676
												Thermoanaerobacteraceae	16	0.00183676
												Legionellaceae	15	0.00172196
												Nocardiaceae	15	0.00172196
												Sedimentisphaeraceae	15	0.00172196
												Synergistaceae	15	0.00172196
												Alteromonadaceae	14	0.00160716
												Azospirillaceae	14	0.00160716
												Bradyrhizobiaceae	14	0.00160716
												Bryobacteraceae	14	0.00160716
												Pseudonocardiaceae	14	0.00160716
												Brachyspiraceae	13	0.00149237
												Devosiaceae	13	0.00149237
												Planococcaceae	13	0.00149237
												Rubrobacteraceae	13	0.00149237
												Thermoactinomycetaceae	13	0.00149237
												Deinococcaceae	12	0.00137757
												Flavobacteriaceae	12	0.00137757
												Halomonadaceae	12	0.00137757
												Propionibacteriaceae	12	0.00137757
												Spirochaetaceae	12	0.00137757
												Campylobacteraceae	11	0.00126277
												Fimbriimonadaceae	11	0.00126277
												Lachnospiraceae	11	0.00126277
												Rhodanobacteraceae	11	0.00126277
												Sphingobacteriaceae	11	0.00126277
												Halobacteriovoraceae	10	0.00114797
												Iamiaceae	10	0.00114797
												Leptotrichiaceae	10	0.00114797
												Listeriaceae	10	0.00114797
												Tepidiformaceae	10	0.00114797
												Thermaceae	10	0.00114797
												Erysipelotrichaceae	9	0.00103318
												Hydrogenophilaceae	9	0.00103318
												Thermotomaculaceae	9	0.00103318
												Alicyclobacillaceae	8	0.000918379
												Atopobiaceae	8	0.000918379
												Desulfobacteraceae	8	0.000918379
												Erwiniaceae	8	0.000918379
												Streptosporangiaceae	8	0.000918379
												Syntrophomonadaceae	8	0.000918379
												Candidatus Brocadiaceae	8	0.000918379
												Candidatus Nanopelagicaceae	8	0.000918379

## Sheet: Genus
Moonmilk Tomba Maggi				Moonmilk Tomba Scudi				sandstone				calcarenite
Paracoccus	527	0.165984		Escherichia	592	0.170507		Escherichia	1576	0.397378		Francisella	1425	0.18139
Escherichia	293	0.0922835		Leptolyngbya	434	0.125		Francisella	725	0.182804		Escherichia	1311	0.16574
Francisella	248	0.0781102		Francisella	362	0.104263		Bacillus	209	0.0526979		Bacillus	528	0.0667509
Cereibacter	195	0.0614173		Cutibacterium	202	0.0581797		Leptolyngbya	166	0.0418558		Burkholderia	277	0.035019
Caulobacter	153	0.048189		Hyphomicrobium	155	0.0446429		Nordella	112	0.02824		Nitrospira	262	0.0331226
Cutibacterium	114	0.0359055		Nitrobacter	120	0.0345622		Sulfuricaulis	99	0.0249622		Salmonella	187	0.023641
Acinetobacter	108	0.0340157		Pseudonocardia	106	0.03053		Burkholderia	83	0.0209279		Sphingomonas	152	0.0192162
Kaistella	88	0.0277165		Streptococcus	86	0.0247696		Salmonella	67	0.0168936		Acinetobacter	124	0.0156764
Candidatus Babela	83	0.0261417		Polaromonas	82	0.0236175		Nitrospira	63	0.015885		Pseudomonas	117	0.0147914
Bacillus	79	0.0248819		Staphylococcus	82	0.0236175		Acinetobacter	52	0.0131114		Gemmatimonas	114	0.0144121
Micrococcus	79	0.0248819		Methylobacterium	77	0.0221774		Opitutus	51	0.0128593		Gemmatirosa	94	0.0118837
Chryseobacterium	78	0.0245669		Nitrospira	73	0.0210253		Streptomyces	42	0.01059		Luteitalea	89	0.0112516
Methyloceanibacter	78	0.0245669		Filomicrobium	68	0.0195853		Luteitalea	38	0.00958144		Opitutus	89	0.0112516
Staphylococcus	77	0.024252		Steroidobacter	68	0.0195853		Acetobacter	37	0.0093293		Liberibacter	84	0.0106195
Pseudoxanthomonas	72	0.0226772		Burkholderia	60	0.0172811		Pseudomonas	36	0.00907716		Klebsiella	79	0.00998736
Streptomyces	65	0.0204724		Sphingomonas	60	0.0172811		Candidatus Solibacter	35	0.00882501		Streptomyces	77	0.00973451
Aerococcus	62	0.0195276		Bacillus	59	0.0169931		Klebsiella	32	0.00806858		Corynebacterium	74	0.00935525
Sphingomonas	50	0.015748		Hypericibacter	58	0.0167051		Hypericibacter	30	0.0075643		Phycisphaera	74	0.00935525
Streptococcus	45	0.0141732		Nitrospirillum	56	0.016129		Sulfurifustis	28	0.00706001		Vibrio	74	0.00935525
Haematobacter	42	0.0132283		Vibrio	54	0.015553		Paenibacillus	27	0.00680787		Paenibacillus	66	0.00834387
Rhizobium	38	0.0119685		Methylocella	51	0.0146889		Coxiella	26	0.00655572		Neisseria	65	0.00821745
Massilia	35	0.0110236		Sphaerotilus	46	0.0132488		Gemmatirosa	26	0.00655572		Comamonas	63	0.0079646
Vibrio	34	0.0107087		Salmonella	36	0.0103687		Hylemonella	25	0.00630358		Methyloceanibacter	61	0.00771176
Burkholderia	33	0.0103937		Acetobacter	35	0.0100806		Nibricoccus	23	0.00579929		Poriferisphaera	61	0.00771176
Bifidobacterium	32	0.0100787		Corynebacterium	31	0.00892857		Paludibaculum	23	0.00579929		Desulfovibrio	54	0.0068268
Epilithonimonas	31	0.00976378		Pseudomonas	30	0.00864055		Shigella	23	0.00579929		Nordella	49	0.00619469
Actinomarinicola	29	0.00913386		Luteitalea	29	0.00835253		Chryseolinea	20	0.00504286		Leptolyngbya	48	0.00606827
Actibacterium	28	0.0088189		Comamonas	28	0.00806452		Steroidobacter	20	0.00504286		Mycolicibacterium	47	0.00594185
Herbaspirillum	28	0.0088189		Streptomyces	28	0.00806452		Chitinophaga	18	0.00453858		Pseudolysobacter	47	0.00594185
Mycobacterium	26	0.00818898		Aquisalimonas	22	0.00633641		Sphingomonas	18	0.00453858		Bifidobacterium	46	0.00581542
Blastococcus	25	0.00787402		Klebsiella	21	0.00604839		Yersinia	17	0.00428643		Alkalilimnicola	45	0.005689
Sulfitobacter	22	0.00692913		Acinetobacter	20	0.00576037		Aquicella	16	0.00403429		Urbifossiella	45	0.005689
Luteitalea	21	0.00661417		Luteimonas	20	0.00576037		Denitratisoma	16	0.00403429		Heyndrickxia	44	0.00556258
Salmonella	21	0.00661417		Mycolicibacterium	17	0.00489631		Niveibacterium	15	0.00378215		Ottowia	43	0.00543616
Hyphomicrobium	20	0.00629921		Gemmatimonas	15	0.00432028		Anaeromyxobacter	14	0.00353001		Staphylococcus	43	0.00543616
Roseicitreum	20	0.00629921		Paludibaculum	15	0.00432028		Cupriavidus	14	0.00353001		Massilia	41	0.00518331
Pirellula	19	0.00598425		Rhizobium	15	0.00432028		Gemmatimonas	13	0.00327786		Streptococcus	41	0.00518331
Nordella	18	0.00566929		Schaalia	15	0.00432028		Sandaracinus	13	0.00327786		Clostridium	40	0.00505689
Nitrospira	17	0.00535433		Candidatus Endolissoclinum	15	0.00432028		Clostridium	12	0.00302572		Polynucleobacter	39	0.00493047
Shigella	16	0.00503937		Azospirillum	14	0.00403226		Crassaminicella	12	0.00302572		Chryseolinea	38	0.00480405
Sulfuricaulis	15	0.00472441		Planctomyces	14	0.00403226		Vibrio	12	0.00302572		Azoarcus	37	0.00467762
Prevotella	14	0.00440945		Ferrovibrio	13	0.00374424		Heyndrickxia	10	0.00252143		Usitatibacter	36	0.0045512
Candidatus Vampirococcus	14	0.00440945		Lactobacillus	13	0.00374424		Paraburkholderia	10	0.00252143		Nibricoccus	35	0.00442478
Klebsiella	11	0.00346457		Rhodococcus	13	0.00374424		Shewanella	10	0.00252143		Desulfotomaculum	34	0.00429836
Steroidobacter	11	0.00346457		Shigella	13	0.00374424		Fimbriimonas	9	0.00226929		Ereboglobus	33	0.00417193
Thioclava	11	0.00346457		Tistrella	11	0.0031682		Fluviibacter	9	0.00226929		Hypericibacter	32	0.00404551
Candidatus Kuenenia	11	0.00346457		Gordonia	10	0.00288018		Polynucleobacter	9	0.00226929		Caminibacter	31	0.00391909
Corynebacterium	10	0.00314961		Heyndrickxia	10	0.00288018		Zhongshania	9	0.00226929		Nocardiopsis	31	0.00391909
Lacticaseibacillus	10	0.00314961		Mycobacterium	10	0.00288018		Azoarcus	8	0.00201715		Solimonas	31	0.00391909
Rhodococcus	10	0.00314961		Pseudolysobacter	8	0.00230415		Candidatus Sneabacter	8	0.00201715		Syntrophotalea	29	0.00366625
Pseudomonas	9	0.00283465										Shewanella	28	0.00353982
												Nitrosomonas	26	0.00328698
												Cupriavidus	25	0.00316056
												Variovorax	25	0.00316056
												Yersinia	25	0.00316056
												Candidatus Koribacter	25	0.00316056
												Candidatus Nitrotoga	25	0.00316056
												Acidovorax	24	0.00303413
												Sorangium	24	0.00303413
												Caldilinea	23	0.00290771
												Candidatus Solibacter	23	0.00290771
												Lactiplantibacillus	22	0.00278129
												Candidatus Methylopumilus	22	0.00278129
												Candidatus Vampirococcus	22	0.00278129
												Acetobacter	21	0.00265487
												Anaerolinea	21	0.00265487
												Humisphaera	21	0.00265487
												Aquabacterium	20	0.00252845
												Shigella	20	0.00252845
												Kaustia	19	0.00240202
												Sinimarinibacterium	19	0.00240202
												Xanthomonas	19	0.00240202
												Bdellovibrio	18	0.0022756
												Methylocella	18	0.0022756
												Leptospirillum	17	0.00214918
												Roseateles	17	0.00214918
												Sutterella	17	0.00214918
												Terriglobus	17	0.00214918
												Dichelobacter	16	0.00202276
												Gordonibacter	16	0.00202276
												Legionella	16	0.00202276
												Paraburkholderia	16	0.00202276
												Sandaracinus	16	0.00202276
												Aeromonas	15	0.00189633
												Azospirillum	15	0.00189633
												Bordetella	15	0.00189633
												Enterococcus	15	0.00189633
												Rhizobium	15	0.00189633
												Mycetohabitans	14	0.00176991
												Mycoplasma	14	0.00176991
												Paludibaculum	14	0.00176991
												Rhodococcus	14	0.00176991
												Stenotrophomonas	14	0.00176991
												Arsenophonus	13	0.00164349
												Brachyspira	13	0.00164349
												Collimonas	13	0.00164349
												Denitratisoma	13	0.00164349
												Enterobacter	13	0.00164349
												Lysinibacillus	13	0.00164349
												Methylobacterium	13	0.00164349
												Mycobacterium	13	0.00164349
												Niveibacterium	13	0.00164349
												Permianibacter	13	0.00164349
												Rouxiella	13	0.00164349
												Rubrobacter	13	0.00164349
												Acidobacterium	12	0.00151707
												Coxiella	12	0.00151707
												Deinococcus	12	0.00151707
												Desulfomonile	12	0.00151707
												Methyloligella	12	0.00151707
												Methylophilus	12	0.00151707
												Acidihalobacter	11	0.00139064
												Acidisarcina	11	0.00139064
												Alteromonas	11	0.00139064
												Fimbriimonas	11	0.00139064
												Pelolinea	11	0.00139064
												Treponema	11	0.00139064
												Achromobacter	10	0.00126422
												Actinobacillus	10	0.00126422
												Actinomarinicola	10	0.00126422
												Halobacteriovorax	10	0.00126422
												Listeria	10	0.00126422
												Microvirga	10	0.00126422
												Tepidiforma	10	0.00126422
												Candidatus Endolissoclinum	10	0.00126422
												Hydrogenophilus	9	0.0011378
												Leptotrichia	9	0.0011378
												Serratia	9	0.0011378
												Thermotomaculum	9	0.0011378
												Aquicella	8	0.00101138
												Hyphomicrobium	8	0.00101138
												Meiothermus	8	0.00101138
												Candidatus Kuenenia	8	0.00101138

## Sheet: Specie
Moonmilk Tomba Maggi				Moonmilk Tomba Scudi				sandstone				calcarenite
Escherichia coli	293	0.112132		Escherichia coli	597	0.195866		Escherichia coli	1593	0.435841		Francisella halioticida	1424	0.205276
Francisella halioticida	248	0.0949101		Leptolyngbya sp. 7M	433	0.14206		Francisella halioticida	725	0.198358		Escherichia coli	1365	0.196771
Paracoccus kondratievae	239	0.0914657		Francisella halioticida	362	0.118766		Leptolyngbya sp. 7M	163	0.0445964		Bacillus cereus	242	0.0348854
Cereibacter sphaeroides	197	0.0753923		Cutibacterium acnes	213	0.0698819		Bacillus cereus	161	0.0440492		Salmonella enterica	197	0.0283984
Cutibacterium acnes	118	0.0451588		Polaromonas sp. JS666	98	0.0321522		Nordella sp. HKS 07	142	0.0388509		Burkholderia pseudomallei	129	0.0185959
Micrococcus luteus	115	0.0440107		Sphaerotilus natans	86	0.0282152		Sulfuricaulis limicola	99	0.0270862		Sphingomonas paucimobilis	123	0.017731
Epilithonimonas vandammei	97	0.0371221		Hyphomicrobium sp. MC1	82	0.0269029		Salmonella enterica	68	0.0186047		Candidatus Nitrospira inopinata	120	0.0172985
Methyloceanibacter caenitepidi	87	0.0332951		Pseudonocardia sp. CGMCC 4.1532	74	0.0242782		Opitutus terrae	51	0.0139535		Bifidobacterium animalis	118	0.0170102
Candidatus Babela massiliensis	83	0.0317643		Candidatus Filomicrobium marinum	69	0.0226378		Burkholderia thailandensis	44	0.0120383		Acinetobacter baumannii	109	0.0157128
Paracoccus yeei	76	0.0290853		Steroidobacter denitrificans	68	0.0223097		Acinetobacter baumannii	39	0.0106703		Gemmatirosa kalamazoonesis	94	0.0135505
Pseudoxanthomonas suwonensis	72	0.0275545		Nitrospirillum amazonense	63	0.0206693		Burkholderia pseudomallei	39	0.0106703		Gemmatimonas phototrophica	89	0.0128298
Acinetobacter baumannii	69	0.0264064		Staphylococcus aureus	61	0.0200131		Luteitalea pratensis	38	0.0103967		Luteitalea pratensis	89	0.0128298
Paracoccus contaminans	67	0.025641		Hyphomicrobium nitrativorans	58	0.0190289		Candidatus Nitrospira inopinata	36	0.00984952		Opitutus terrae	85	0.0122531
Aerococcus viridans	61	0.0233448		Sphingomonas paucimobilis	58	0.0190289		Candidatus Solibacter usitatus	35	0.00957592		Nitrospira moscoviensis	84	0.012109
Paracoccus denitrificans	50	0.0191351		Streptococcus thermophilus	52	0.0170604		Sulfurifustis variabilis	28	0.00766074		Burkholderia thailandensis	81	0.0116765
Bacillus cereus	46	0.0176043		Hypericibacter adhaerens	51	0.0167323		Gemmatirosa kalamazoonesis	27	0.00738714		Bacillus velezensis	75	0.0108116
Staphylococcus aureus	46	0.0176043		Vibrio anguillarum	51	0.0167323		Klebsiella pneumoniae	26	0.00711354		Phycisphaera mikurensis	74	0.0106674
Paracoccus sp. MC1862	43	0.0164562		Methylobacterium sp. WL1	36	0.011811		Hylemonella gracilis	25	0.00683995		Burkholderia mallei	70	0.0100908
Haematobacter massiliensis	42	0.0160735		Salmonella enterica	36	0.011811		Nibricoccus aquaticus	23	0.00629275		Pseudomonas aeruginosa	68	0.00980251
Actinomarinicola tropica	40	0.0153081		Methylocella silvestris	33	0.0108268		Paludibaculum fermentans	23	0.00629275		Comamonas thiooxydans	66	0.0095142
Paracoccus jeotgali	36	0.0137773		Luteitalea pratensis	29	0.00951444		Shigella flexneri	23	0.00629275		Methyloceanibacter caenitepidi	64	0.00922589
Nordella sp. HKS 07	34	0.0130119		Nitrospira japonica	26	0.00853018		Chryseolinea soli	21	0.00574555		Neisseria meningitidis	64	0.00922589
Blastococcus saxobsidens	31	0.0118638		Nitrospira sp. KM1	26	0.00853018		Coxiella burnetii	21	0.00574555		Nordella sp. HKS 07	64	0.00922589
Vibrio anguillarum	29	0.0110984		Pseudonocardia broussonetiae	26	0.00853018		Steroidobacter denitrificans	20	0.00547196		Bacillus subtilis	62	0.00893758
Confluentimicrobium sp. EMB200-NS6	28	0.0107157		Methylobacterium nodulans	24	0.00787402		Nitrospira moscoviensis	18	0.00492476		Pseudolysobacter antarcticus	62	0.00893758
Massilia oculi	26	0.00995025		Aquisalimonas sp. 2447	22	0.00721785		Sandaracinus amylolyticus	18	0.00492476		Poriferisphaera corsica	61	0.00879343
Sphingomonas paucimobilis	26	0.00995025		Bacillus velezensis	21	0.00688976		Denitratisoma oestradiolicum	16	0.00437756		Syntrophotalea acetylenivorans	55	0.0079285
Herbaspirillum robiniae	25	0.00956755		Methylocella tundrae	20	0.00656168		Crassaminicella sp. SY095	15	0.00410397		Klebsiella pneumoniae	53	0.00764019
Kaistella flava (ex Peng et al. 2021)	25	0.00956755		Acinetobacter baumannii	19	0.0062336		Niveibacterium sp. HC41	15	0.00410397		Bacillus anthracis	50	0.00720773
Staphylococcus pasteuri	23	0.00880214		Luteimonas sp. YGD11-2	19	0.0062336		Aquicella siphonis	12	0.00328317		Nocardiopsis gilva	49	0.00706357
Luteitalea pratensis	21	0.00803674		Hyphomicrobium denitrificans	16	0.00524934		Bacillus velezensis	11	0.00300958		Bacillus thuringiensis	47	0.00677526
Salmonella enterica	21	0.00803674		Rhizobium leguminosarum	16	0.00524934		Bacillus oleronius	10	0.00273598		Alkalilimnicola ehrlichii	46	0.00663111
Roseicitreum antarcticum	20	0.00765404		Candidatus Endolissoclinum faulkneri	15	0.00492126		Shewanella sp. YLB-08	10	0.00273598		Urbifossiella limnaea	45	0.00648695
Pirellula staleyi	19	0.00727134		Candidatus Nitrospira inopinata	15	0.00492126		Bacillus thuringiensis	9	0.00246238		Desulfotomaculum nigrificans	43	0.00619864
Hyphomicrobium sp. MC1	18	0.00688863		Gemmatimonas phototrophica	15	0.00492126		Fimbriimonas ginsengisoli	9	0.00246238		Bacillus oleronius	42	0.00605449
Shigella flexneri	16	0.00612323		Klebsiella pneumoniae	15	0.00492126		Fluviibacter phosphoraccumulans	9	0.00246238		Sphingomonas alpina	40	0.00576618
Sulfuricaulis limicola	15	0.00574053		Paludibaculum fermentans	15	0.00492126		Zhongshania aliphaticivorans	9	0.00246238		Collimonas pratensis	39	0.00562203
Candidatus Vampirococcus archaeovorus	14	0.00535783		Pseudonocardia dioxanivorans	15	0.00492126		Azoarcus pumilus	8	0.00218878		Polynucleobacter necessarius	39	0.00562203
Bacillus amyloliquefaciens	11	0.00420972		Staphylococcus haemolyticus	15	0.00492126		Bacillus anthracis	8	0.00218878		Staphylococcus aureus	39	0.00562203
Bacillus thuringiensis	11	0.00420972		Ferrovibrio terrae	14	0.00459318		Candidatus Sneabacter namystus	8	0.00218878		Chryseolinea soli	38	0.00547787
Candidatus Kuenenia stuttgartiensis	11	0.00420972		Planctomyces sp. SH-PL14	14	0.00459318						Azoarcus pumilus	36	0.00518956
Lacticaseibacillus paracasei	11	0.00420972		Schaalia odontolytica	14	0.00459318						Nibricoccus aquaticus	36	0.00518956
Sphingomonas lacunae	11	0.00420972		Lactobacillus iners	13	0.00426509						Acidovorax antarcticus	34	0.00490125
Steroidobacter denitrificans	11	0.00420972		Shigella flexneri	13	0.00426509						Ereboglobus luteus	34	0.00490125
Sulfitobacter mediterraneus	11	0.00420972		Tistrella mobilis	12	0.00393701						Mycobacterium marinum	32	0.00461295
Thioclava electrotropha	11	0.00420972		Bacillus oleronius	10	0.00328084						Caminibacter mediatlanticus	31	0.00446879
Klebsiella pneumoniae	9	0.00344432		Pseudolysobacter antarcticus	8	0.00262467						Solimonas sp. K1W22B-7	31	0.00446879
												Usitatibacter palustris	31	0.00446879
												Nitrospira sp. KM1	30	0.00432464
												Candidatus Koribacter versatilis	29	0.00418048
												Kaustia mangrovi	29	0.00418048
												Paenibacillus thiaminolyticus	27	0.00389217
												Candidatus Nitrotoga sp. AM1P	26	0.00374802
												Nitrospira japonica	26	0.00374802
												Shewanella sp. YLB-08	26	0.00374802
												Candidatus Solibacter usitatus	24	0.00345971
												Sorangium cellulosum	24	0.00345971
												Caldilinea aerophila	23	0.00331555
												Candidatus Methylopumilus turicensis	22	0.0031714
												Candidatus Vampirococcus archaeovorus	22	0.0031714
												Humisphaera borealis	21	0.00302725
												Methylocella tundrae	21	0.00302725
												Rhizobium leguminosarum	21	0.00302725
												Aquabacterium olei	20	0.00288309
												Nitrosomonas eutropha	20	0.00288309
												Shigella flexneri	20	0.00288309
												Sinimarinibacterium sp. NLF-5-8	19	0.00273894
												Anaerolinea thermophila	18	0.00259478
												Gemmatimonas aurantiaca	18	0.00259478
												Methyloligella sp. GL2	18	0.00259478
												Pseudomonas putida	18	0.00259478
												Acidisarcina polymorpha	17	0.00245063
												Leptospirillum ferrooxidans	17	0.00245063
												Roseateles depolymerans	17	0.00245063
												Sutterella megalosphaeroides	17	0.00245063
												Dichelobacter nodosus	16	0.00230647
												Gordonibacter pamelaeae	16	0.00230647
												Sandaracinus amylolyticus	16	0.00230647
												Vibrio parahaemolyticus	16	0.00230647
												Desulfomonile tiedjei	14	0.00201816
												Mycetohabitans rhizoxinica	14	0.00201816
												Paludibaculum fermentans	14	0.00201816
												Denitratisoma oestradiolicum	13	0.00187401
												Enterococcus faecium	13	0.00187401
												Niveibacterium sp. HC41	13	0.00187401
												Permianibacter aggregans	13	0.00187401
												Rouxiella badensis	13	0.00187401
												Methylophilus sp. TWE2	12	0.00172985
												Coxiella burnetii	11	0.0015857
												Fimbriimonas ginsengisoli	11	0.0015857
												Pelolinea submarina	11	0.0015857
												Streptococcus thermophilus	11	0.0015857
												Actinomarinicola tropica	10	0.00144155
												Candidatus Endolissoclinum faulkneri	10	0.00144155
												Halobacteriovorax marinus	10	0.00144155
												Lysinibacillus timonensis	10	0.00144155
												Rubrobacter sp. SCSIO 52909	10	0.00144155
												Tepidiforma bonchosmolovskayae	10	0.00144155
												Actinobacillus sp. GY-402	9	0.00129739
												Hydrogenophilus thermoluteolus	9	0.00129739
												Thermotomaculum hydrothermale	9	0.00129739
												Arsenophonus nasoniae	8	0.00115324
												Candidatus Kuenenia stuttgartiensis	8	0.00115324
												Lactiplantibacillus paraplantarum	8	0.00115324
												Paraburkholderia caribensis	8	0.00115324
												Serratia rubidaea	8	0.00115324
												Streptococcus pyogenes	8	0.00115324
												Vibrio cholerae	8	0.00115324
												Vibrio taketomensis	8	0.00115324
