# Supplementary material for: Biogenic calcium carbonate as evidence for life
Source: Copernicus journal article supplement (doi:10.5194/egusphere-2022-1457), 2022-12-23
Supplement: Supplementary file 3 [file egusphere-2022-1457-supplement.pdf]

## **Biogenic calcium carbonate as evidence for life**

Sara Ronca<sup>1</sup>, Francesco Mura<sup>2</sup>, Marco Brandano<sup>1</sup>, Angela Cirigliano<sup>3</sup>, Alessandro Grottoli<sup>4</sup>, Massimo Reverberi<sup>5</sup>, Danile Federico Maras<sup>6</sup>, Rodolfo Negri<sup>7</sup>, Ernesto Di Mauro<sup>3</sup> & Teresa Rinaldi<sup>7</sup>

<sup>1</sup>Department of Earth Sciences, Sapienza University of Rome, Italy

<sup>2</sup>CNIS-Center for Nanotechnology Applied to Industry of La Sapienza, 00185, Sapienza University of Rome, Rome, Italy

<sup>3</sup>Istituto di Biologia e Patologia Molecolari, CNR, Rome, Italy

<sup>4</sup>SARA EnviMob s.r.l., Rome, Italy

<sup>5</sup>Department of Environmental Biology, Sapienza University of Rome, Rome, Italy

<sup>6</sup>Soprintendenza Archeologia, Belle Arti e Paesaggio per la Provincia di Viterbo e l'Etruria Meridionale, Ministero della Cultura, Rome, Italy

<sup>7</sup>Department of Biology and Biotechnology, Sapienza University of Rome, Rome, Italy

\* Corresponding author: [teresa.rinaldi@uniroma1.it](mailto:teresa.rinaldi@uniroma1.it)

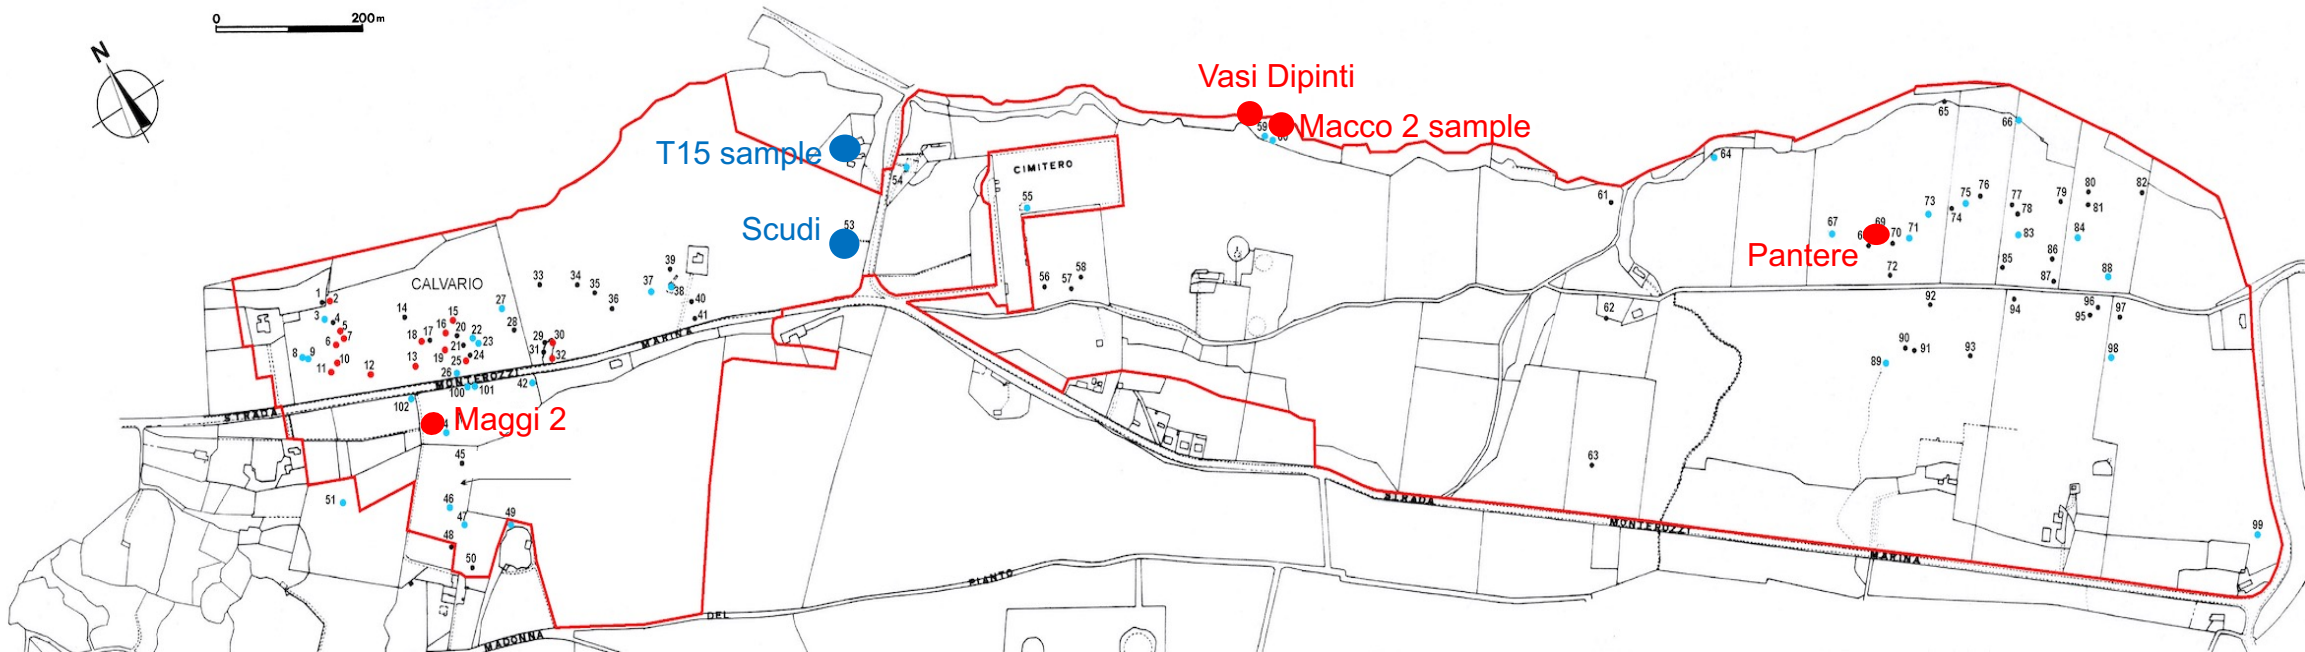

| Name                          | Bedrock          | Distance of the tomb ceiling below ground level (m) | Distance below the ground level where the samples were collected (m) | Thickness of moonmilk speleothem (cm) |
|-------------------------------|------------------|-----------------------------------------------------|----------------------------------------------------------------------|---------------------------------------|
| <i>Tomba delle Pantere</i>    | calcarenite      | 2                                                   | 0                                                                    | 1.5 to 2                              |
| <i>Tomba degli Scudi</i>      | hybrid sandstone | 6                                                   | 3                                                                    | 0.1 to 0.2                            |
| <i>Tomba dei Vasi Dipinti</i> | calcarenite      | 1,5                                                 | 0                                                                    | 0,5                                   |
| <i>Tomba Maggi</i>            | calcarenite      | 3                                                   | 4                                                                    | 1.5 to 2                              |

**Supplementary Fig. 1: map of the Necropolis of Tarquinia where the rocks and moonmilk samples were collected.**

Hybrid sandstone (blue dot) inside the *Tomba degli Scudi* (42.247597, 11.777425), calcarenite (red dots) outside the *Tomba delle Pantere* (42.241378, 11.791685), the *Tomba dei Vasi Dipinti* (42.246033, 11.784395) and inside the *Tomba Maggi* 2 (42.248402, 11.769660). The table indicates the distance of the tomb ceilings below the ground level, the distance below the ground level where the samples were collected, and the thickness of the moonmilk on the tomb walls. Hybrid sandstone sample T15 was collected from the substrate close to the *Tomba degli scudi*. Calcarenite sample Macco 2 was taken from the calcarenite substrate collected outside the *Tomba dei Vasi Dipinti*. Bar: 200 meters. The map was modified from Cirigliano et al., 2021a.



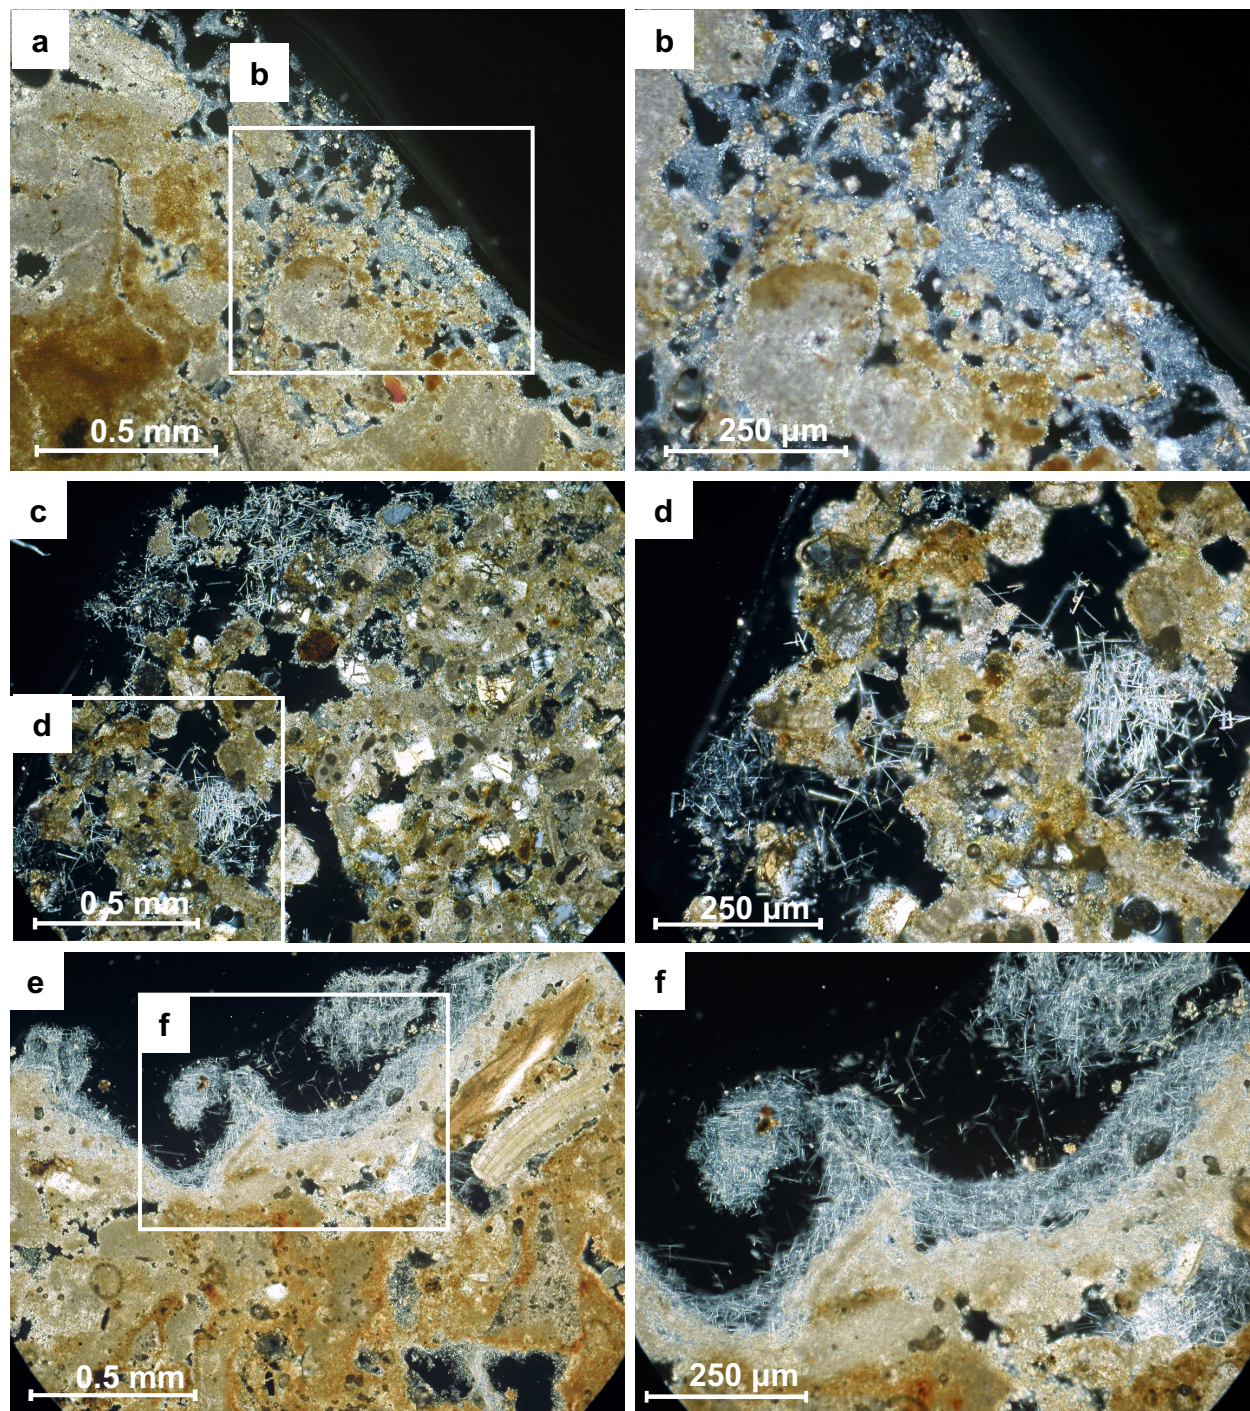

**Supplementary Fig. 2: the moonmilk is present on the surface and inside the calcarenite and the sandstone rocks.**

Optical microscope thin-section micrographs in crossed polarized transmitted light. **a**, calcarenite rock sampled outdoor of the *Tomba dei vasi dipinti*. **b**, enlarged view of the inset in **a**. **c**, hybrid sandstone sample collected inside the *Tomba degli Scudi*. **d**, enlarged view of the inset in **c**. **e**, a calcarenite sample collected inside the *Tomba Maggi 2*. **f**, enlarged view of the inset in **e**.



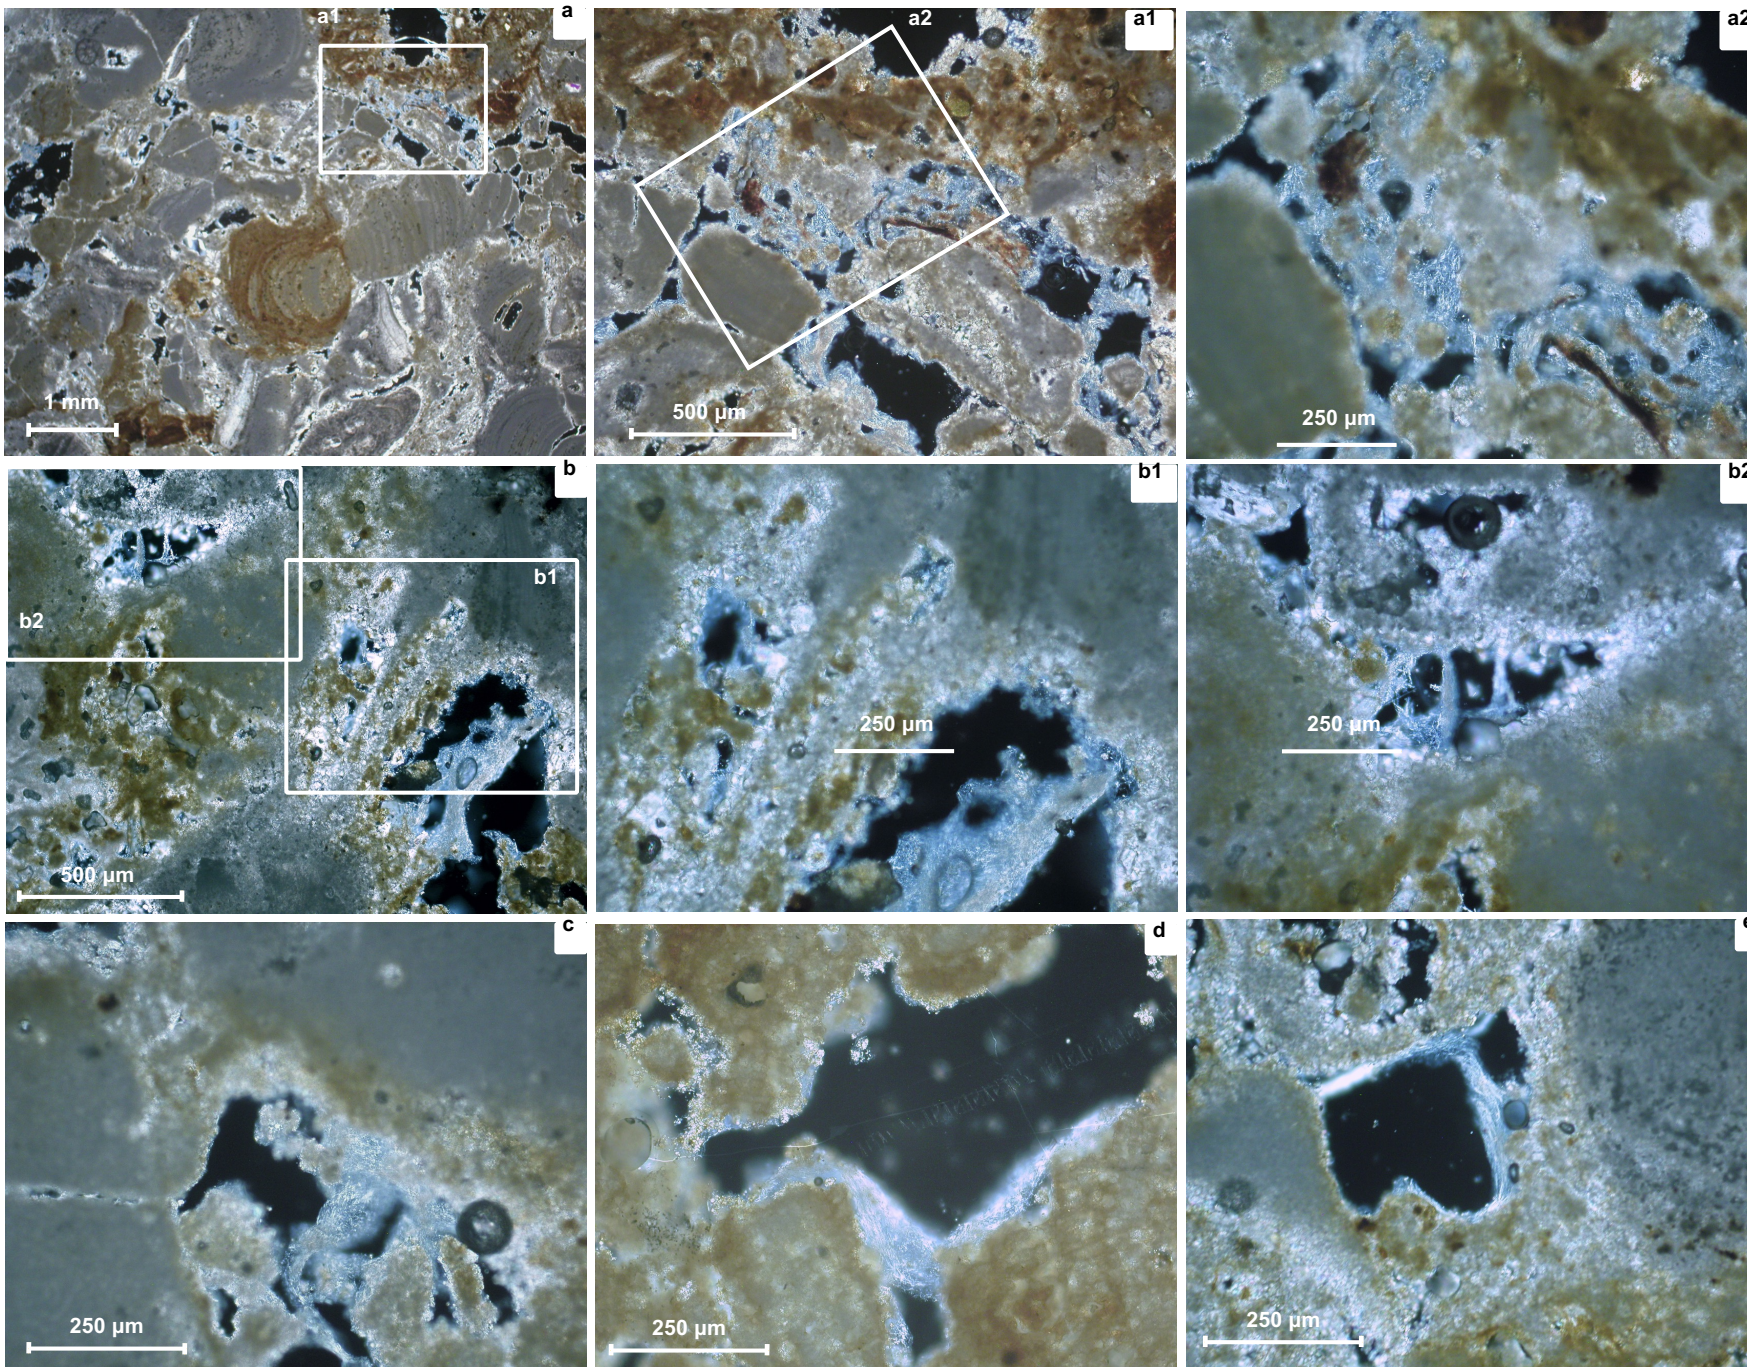

**Supplementary Fig. 3: the moonmilk contributes to the lithogenic processes.** Optical microscope thin-section micrographs (crossed polarized transmitted light) of the moonmilk speleothems of calcarenite sampled from outdoor of *Tomba dei Vasi Dipinti*.



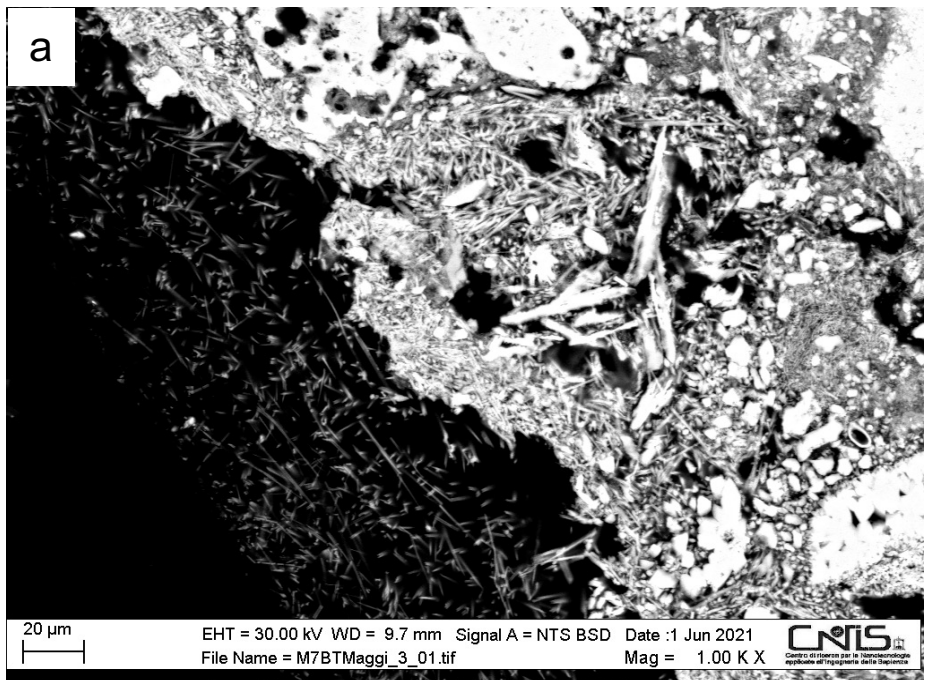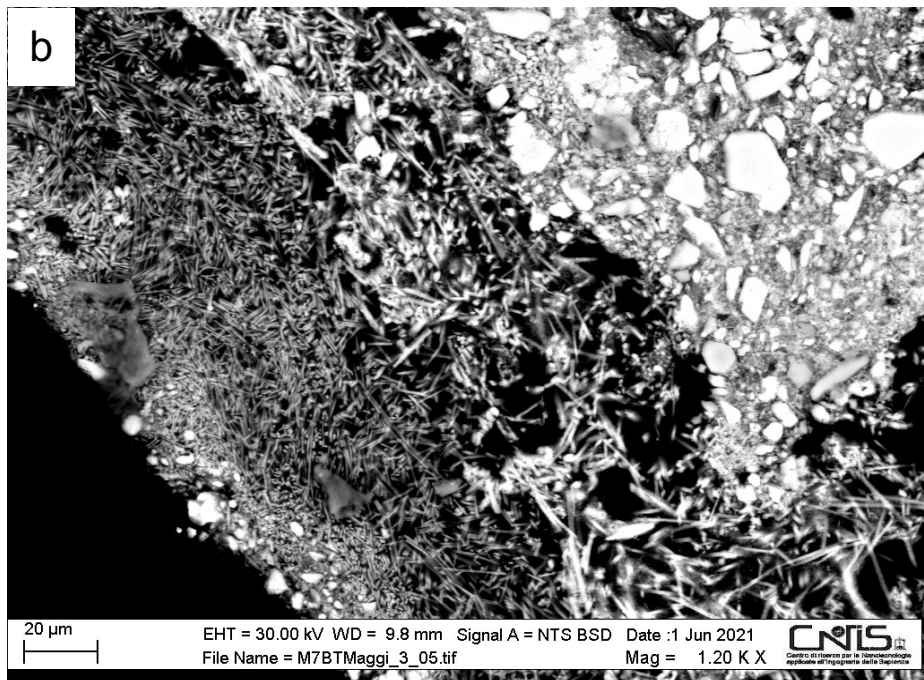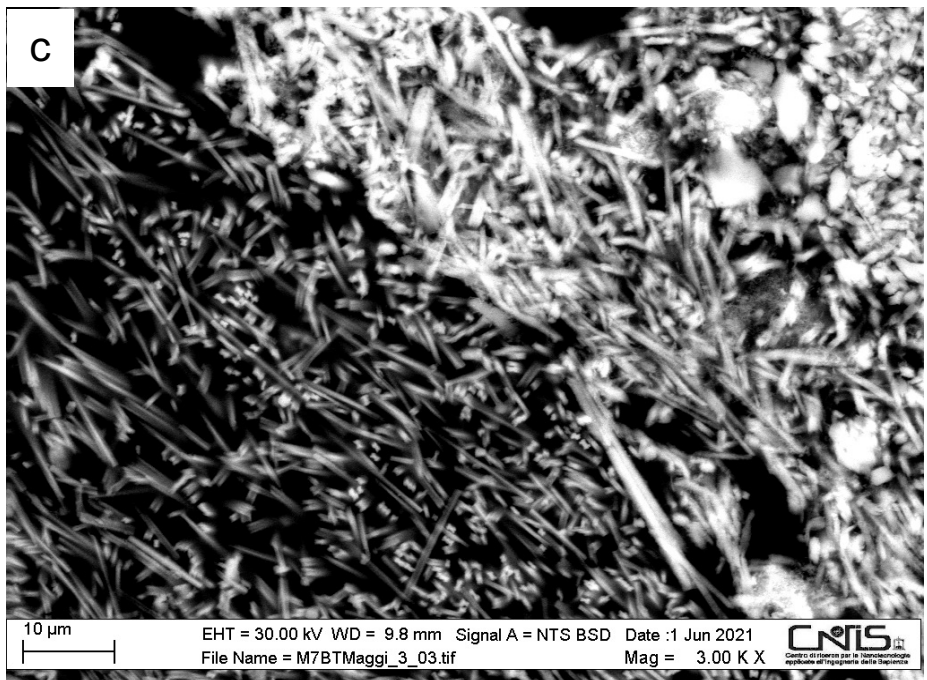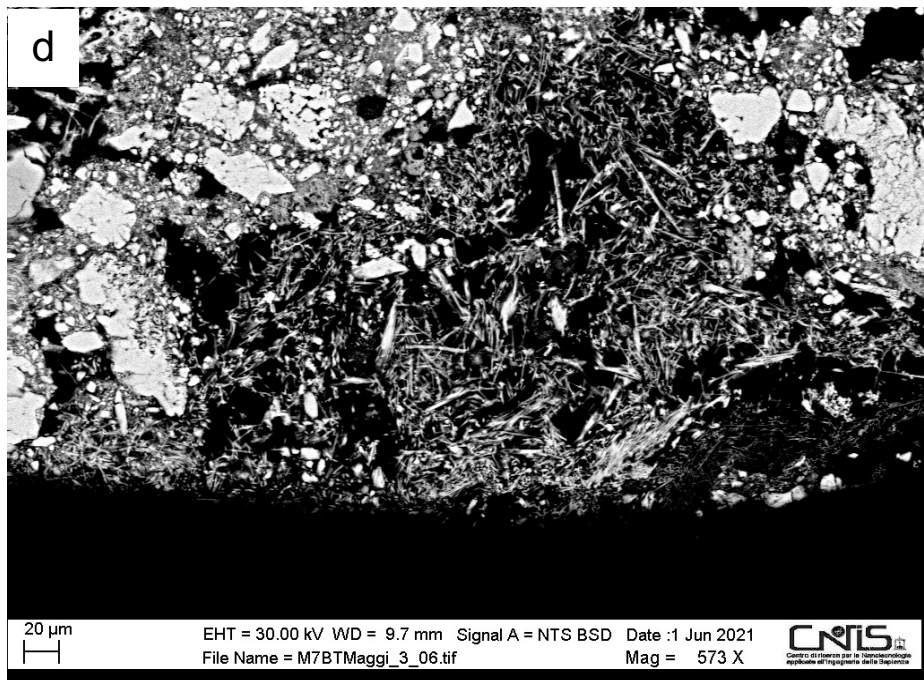

**Supplementary Fig. 4: the moonmilk contributes to the lithogenic processes.** Scanning electron micrographs of a thin-section of the calcarenite sampled indoor of *Tomba Maggi*.



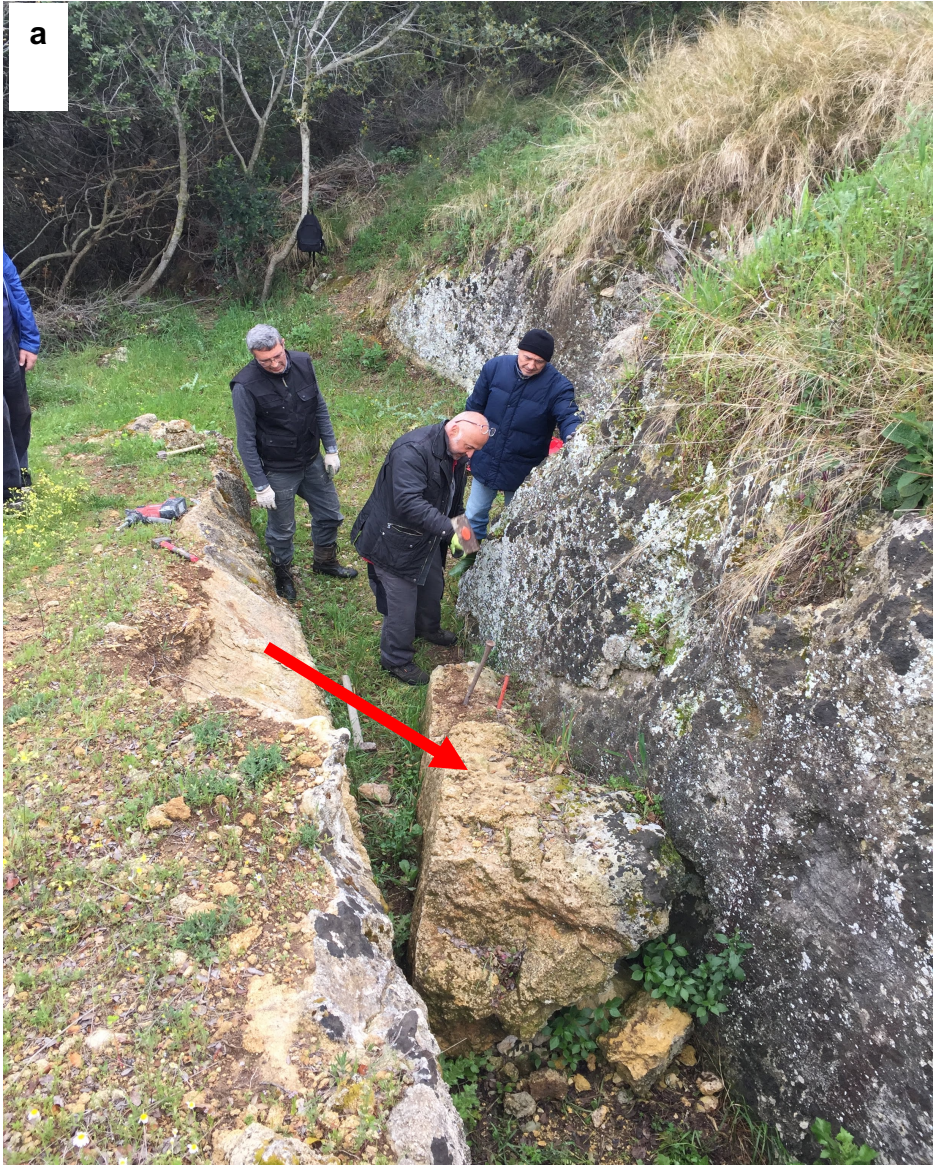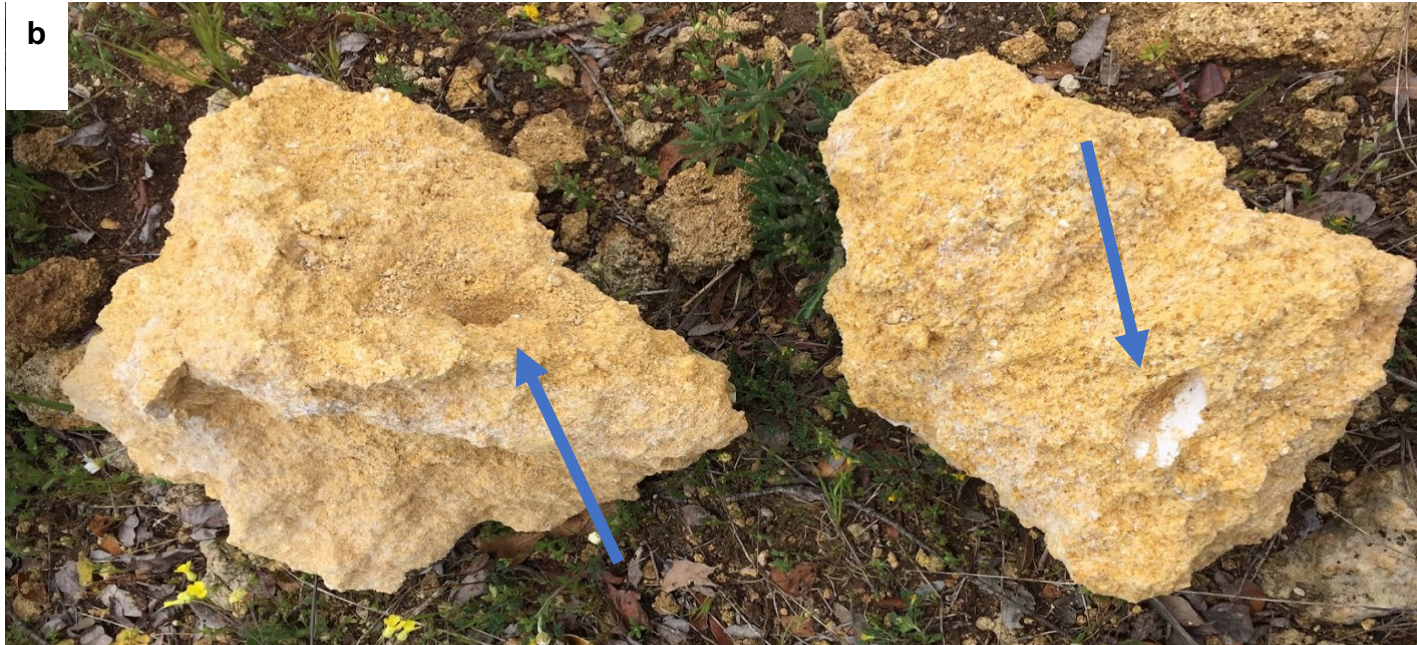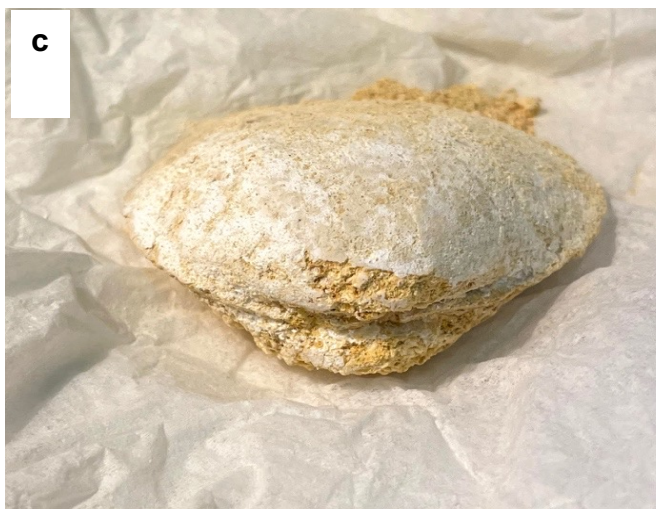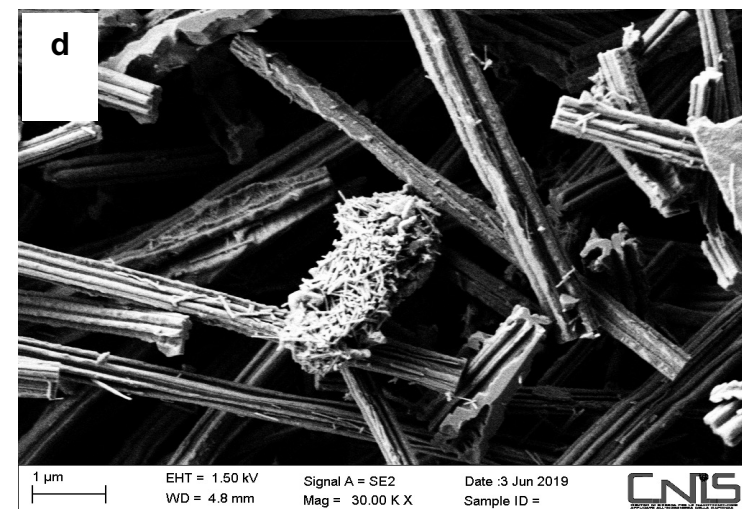

**Supplementary Fig 5. The moonmilk is naturally present deeply inside the calcarenite.**

**a**, the entrance of the *Tomba dei Vasi Dipinti* was blocked by a rock slide; to remove the obstruction, the calcarenite rock (red arrow) was cut in pieces. **b**, the core of the rock contained a mould of a bivalve fossil (*Mastra* genus) covered by moonmilk on one side, blu arrows indicate the position of the fossil inside the rock. **c**, the mould of the bivalve fossil, length 4,5 cm and width 3 cm. **d**, Scanning electron micrographs of the moonmilk sampled from the rock showed in **b**. The moonmilk present inside the rock was more abundant in the interface between the rock and the shell of the bivalve, probably because there was more space availability for the microbial community at the interface between the shell and the rock.



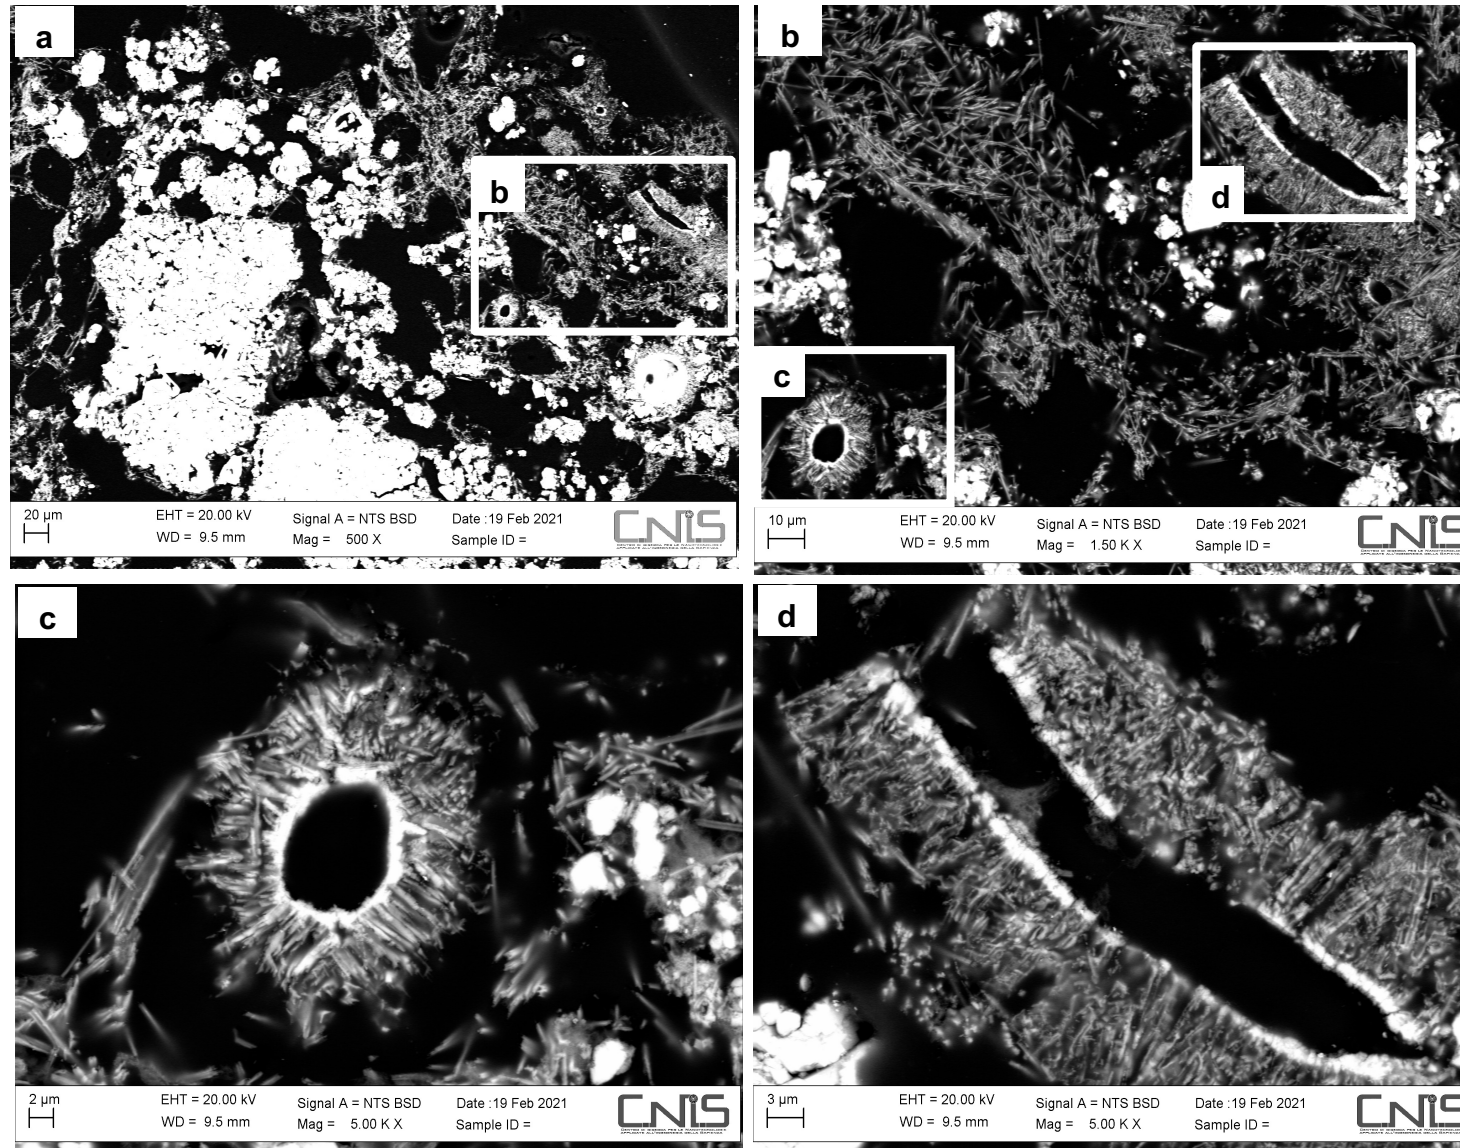

**Supplementary Fig. 6:**  
bacterial biomineralization  
in the calcarenite sampled  
outdoor of the *Tomba dei*  
*Vasi Dipinti*.

**a**, scanning electron  
micrographs of a thin-  
section. **b**, enlarged view of  
the inset in **a**. **c** and **d**:  
enlarged view of the inset in  
**b**.



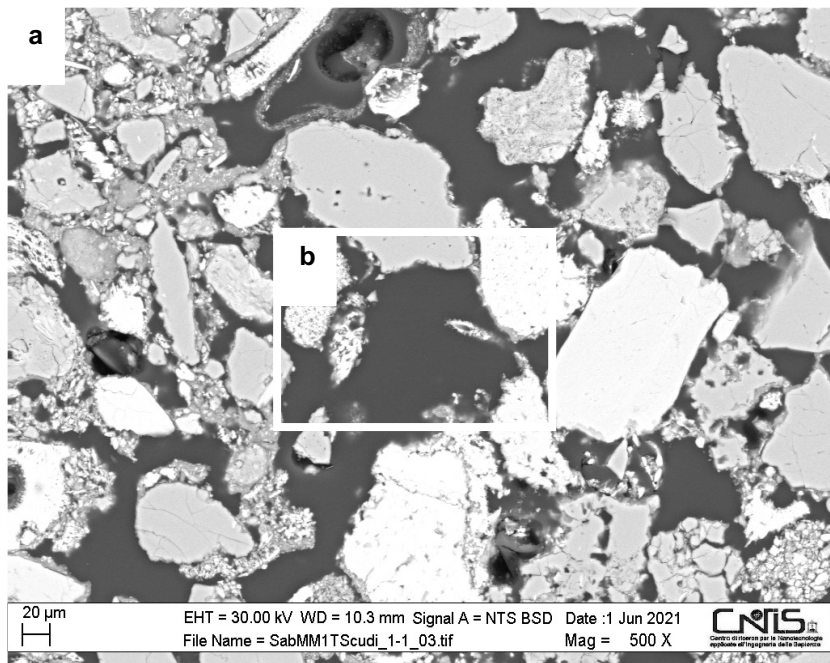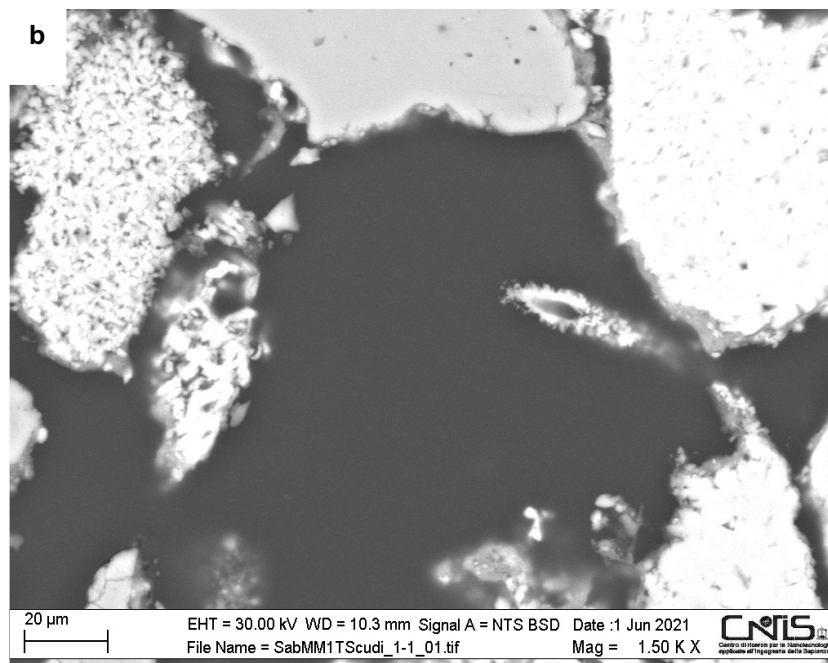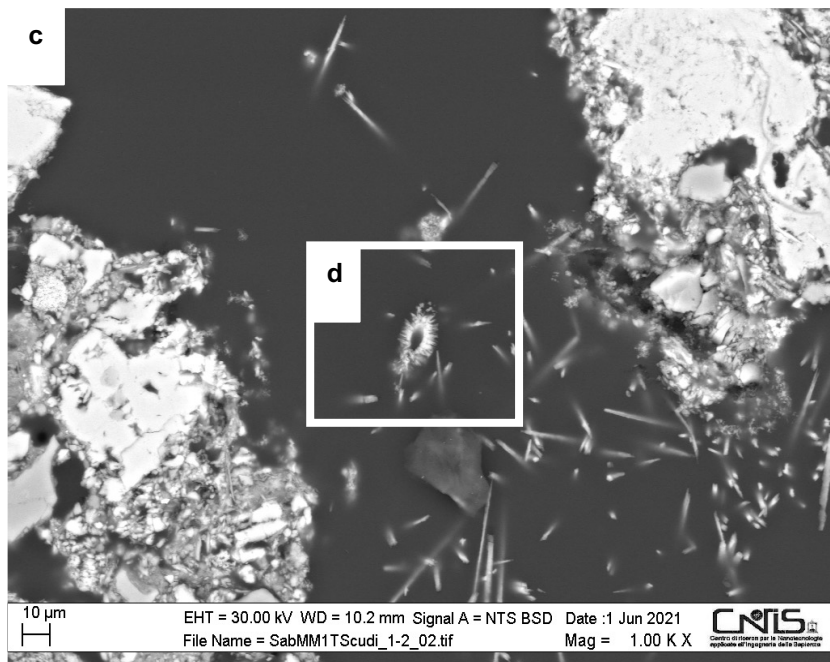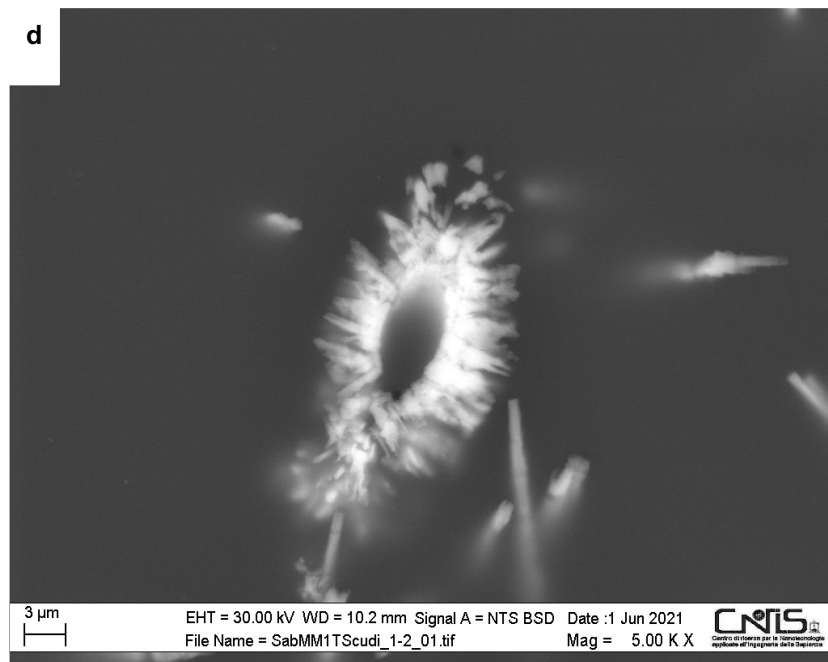

**Supplementary Fig. 7: bacterial biomineralization in the hybrid sandstone sampled indoor the *Tomba degli Scudi*.** Scanning electron micrographs of thin-sections (**a** and **c**). **b**, enlarged view of the inset in **a**. **d**, enlarged view of the inset in **c**.

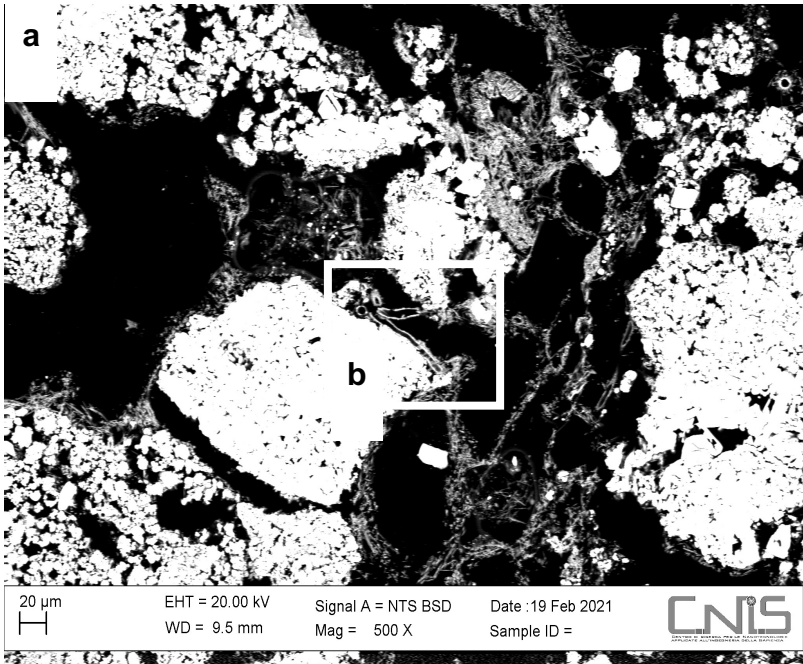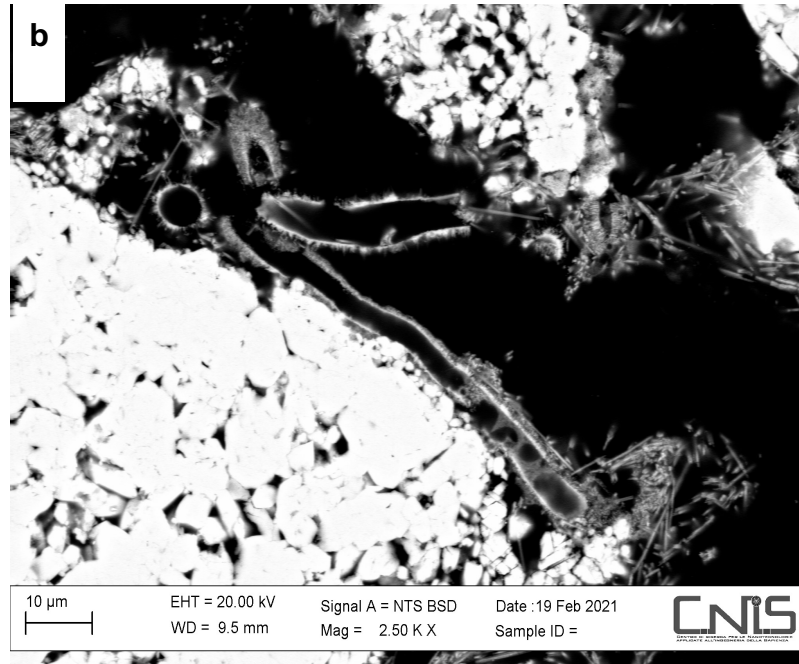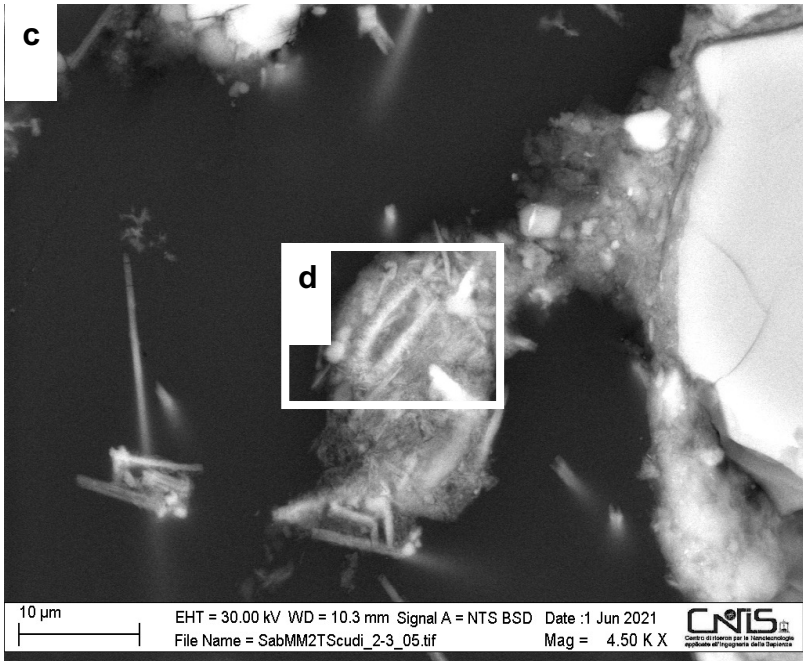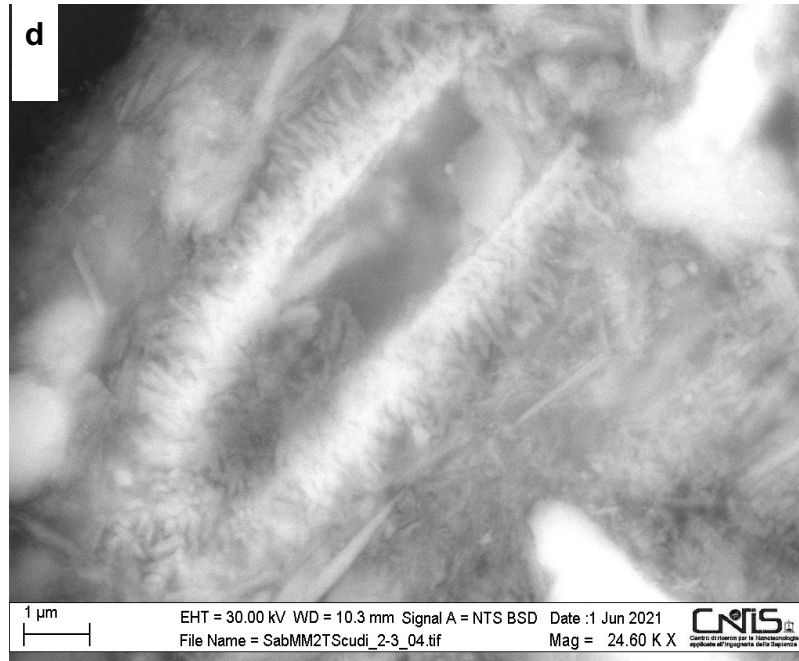

**Supplementary Fig. 8: bacterial biomineralization in the calcarenite.**

**a**, scanning electron micrographs of a thin-section of the calcarenite sampled outdoor of the *Tomba delle Pantere* and **c** indoor of *Tomba Maggi 2*. **b** and **d**: enlarged view of the inset in **a** and **c**, respectively.



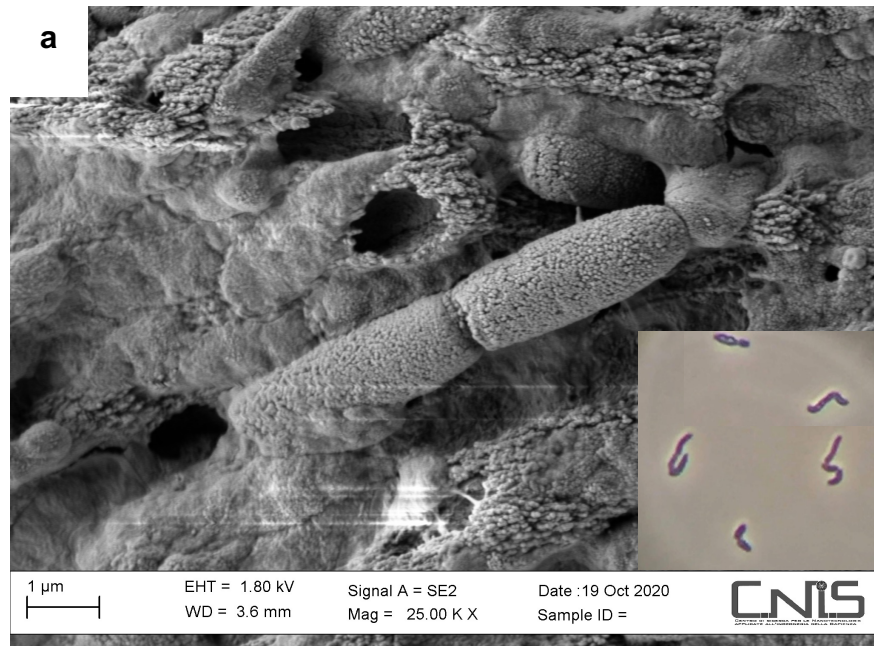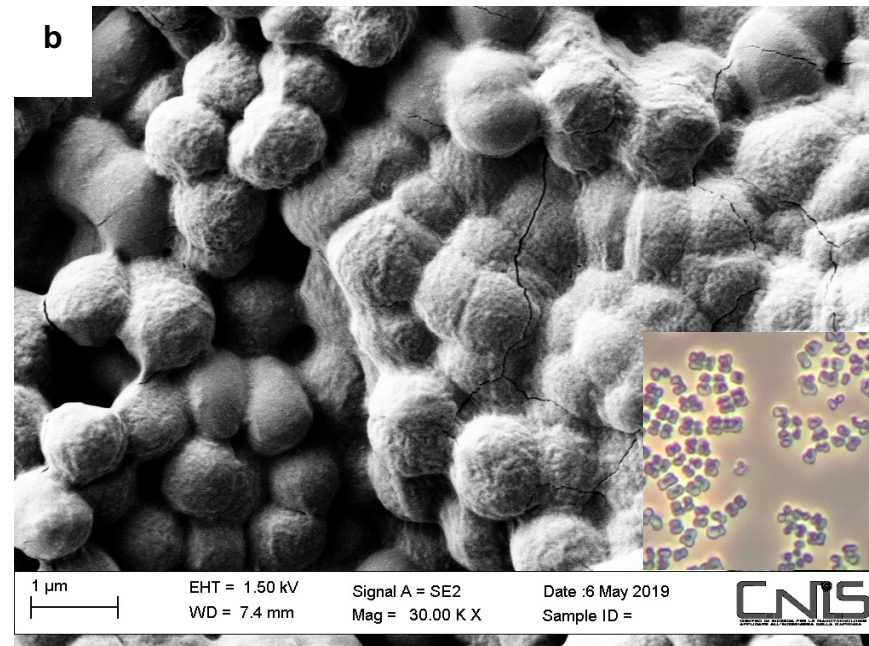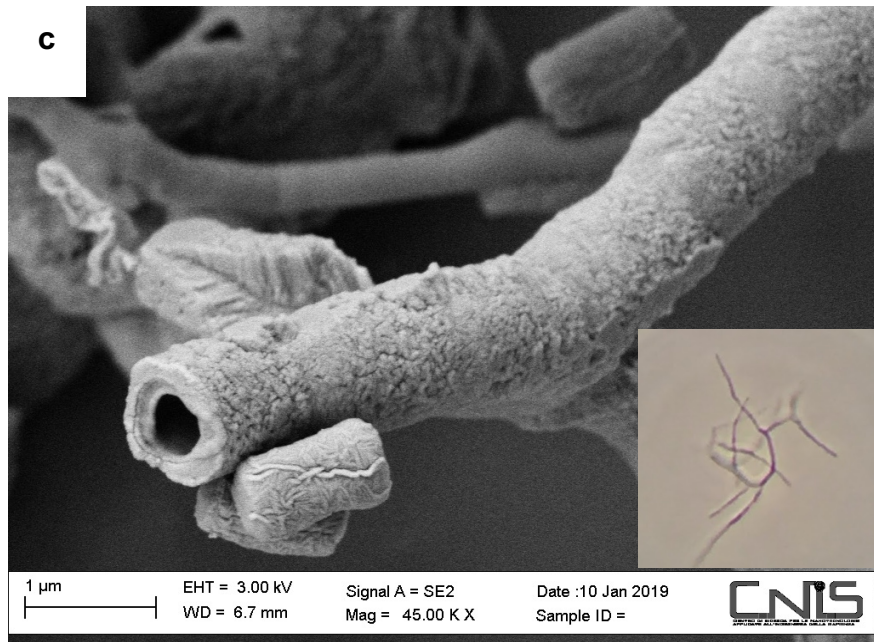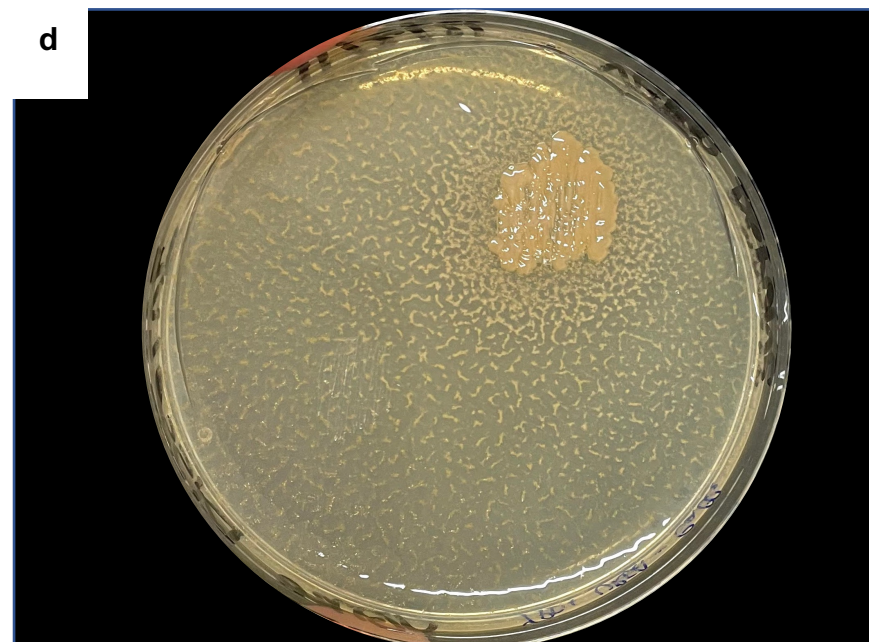

**Supplementary Fig 9: examples of bacterial biomineralization (entombment) in laboratory conditions.**

Scanning electron micrographs of bacterial cultures grown in solid complete medium containing  $\text{CaCl}_2$  and urea to induce calcium carbonate precipitation. **a**, *Bacillus*, **b**, *Sporosarcina* and **c**, *Streptomyces*. The insets correspond to optical microscope micrographs of the same bacterial strains (from our laboratory collection) grown in liquid LB medium. **d**, a carbonatogenic bacterial strain induces biomineralization extracellularly, in a plate (diameter 90 mm), even at distance from the cells. The strain (from our laboratory collection) was grown in solid complete medium containing  $\text{CaCl}_2$  and urea to induce calcium carbonate deposition.

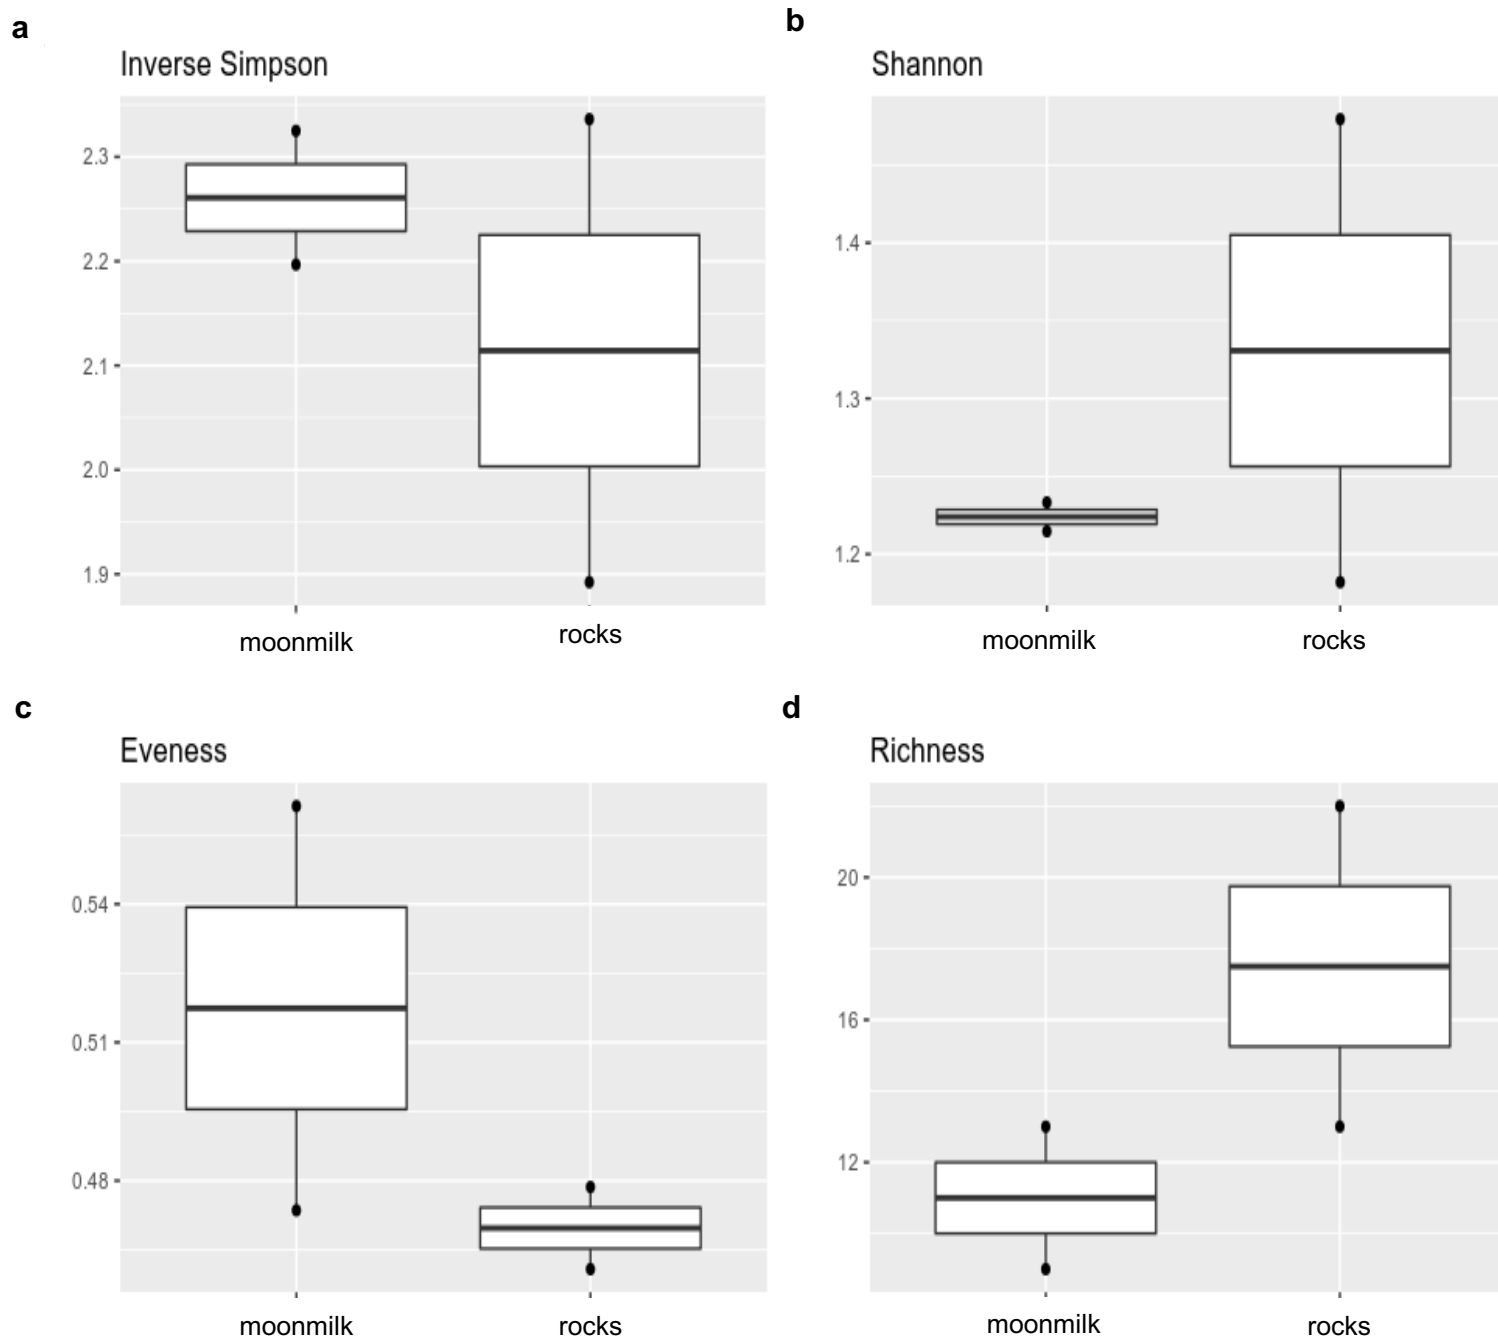

**Supplementary Fig. 10. Comparison of community alpha diversities between moonmilk and rocks.**

Diversity was measured by inverse Simpson **a** and Shannon index **b**. The top and bottom boundaries of each box indicate the 75th and 25th quartile values, respectively. The black lines within each box represent the median values. There is any significant differences between the samples (Mann Whitney test,  $P > 0.05$ ).

Evenness **c** and Richness **d** were measured by the Shannon Evenness index and the number of observed taxa, respectively. In moonmilk samples and rocks samples, the taxa richness was between 9 and 22 taxa (**b** and **d**). Consistently, evenness (Shannon evenness) and community richness (number of observed taxa) do not show any significant differences between the samples (Mann Whitney test,  $P > 0.05$ ).
